1 **Detection of apoptosis and matrical degeneration within the intervertebral**  
2 **discs of rats due to passive cigarette smoking.**

3

4 Masahiro Nakahashi<sup>1,3</sup>, Mariko Esumi<sup>2,3\*</sup>, Yasuaki Tokuhashi<sup>1,3</sup>

5

6 <sup>1</sup> Department of Orthopaedic Surgery, Nihon University School of Medicine,  
7 Itabashi-ku, Tokyo, Japan

8 <sup>2</sup> Department of Biomedical Sciences, Nihon University School of Medicine,  
9 Itabashi-ku, Tokyo, Japan

10 <sup>3</sup> Department of Therapeutics for Aging Locomotive Disorders, Nihon University  
11 School of Medicine, Itabashi-ku, Tokyo, Japan

12

13

14 Short title: Intervertebral disc degeneration by passive cigarette smoking

15

16

17

18 \* Corresponding author

19 E-mail: [esumi.mariko@nihon-u.ac.jp](mailto:esumi.mariko@nihon-u.ac.jp)(ME)

## 21 **Abstract**

22

23           Although low-back pain is considered to be associated with cigarette  
24 smoking, the influence of cigarette smoking on the intervertebral discs (IVD) has  
25 not been confirmed. We established a rat model of passive cigarette smoking-  
26 induced IVD degeneration, and investigated the cytohistological changes in the IVD  
27 and the accompanying changes in gene expression. IVD from rats exposed to 8  
28 weeks of passive cigarette smoking were stained with Elastica van Gieson, and  
29 exhibited marked destruction of the supportive structure of the reticular matrix in  
30 the nucleus pulposus (NP). Positive signals on safranin O, alcian blue, type II  
31 collagen and aggrecan staining were decreased in the destroyed structure.  
32 Safranin O and type II collagen signals were also decreased in the cartilage end-  
33 plate (CEP) after 4- and 8-weeks of cigarette smoking. In the CEP, the potential for  
34 apoptosis was increased significantly, as demonstrated by staining for single-  
35 strand DNA. However, there were no signs of apoptosis in the NP or annulus  
36 fibrosus cells. Based on these findings, we concluded that passive cigarette  
37 smoking-induced stress stimuli first affect the CEP through blood flow due to the  
38 histological proximity, thereby stimulating chondrocyte apoptosis and reduction of  
39 the extracellular matrix (ECM). This leads to reduction of the ECM in the NP,  
40 destroying the NP matrix, which can then progress to IVD degeneration.

41

## 42 **Introduction**

43

44           Low-back pain is a highly prevalent disease, and a major problem for  
45 performing activities of daily living and health economics. Many studies have  
46 reported that cigarette smoking is a risk factor for low-back pain; i.e., 70% of  
47 persons with low-back pain are cigarette smokers, and the frequency, amount and  
48 duration of cigarette smoking correlate with the incidence of low-back pain [1-9]. In

49 contrast, smoking cessation has been reported to improve patient-reported pain  
50 and is related to increased fusion rates [10, 11]. Moreover, cigarette smoking is  
51 also associated with degenerative disc disease, including middle-aged disc  
52 herniation [12-15]. Cigarette smoking leads to the formation of carboxy-hemoglobin  
53 [16], vasoconstriction [16] and arteriosclerosis [16, 17], and thus decreases oxygen  
54 transport and blood flow [16, 17]. These events are considered to lead to  
55 malnutrition of the intervertebral discs (IVD) and promote IVD degeneration.  
56 Studies using animal models and *in vitro* culturing of disc cells suggested that  
57 nicotine and tobacco smoke exposure induces degenerative changes in the spine  
58 [18-22]. Although there have been significant advances in our understanding of the  
59 biology underlying IVD degeneration [23] [24], the molecular mechanisms  
60 underlying the IVD changes induced by cigarette smoking remain to be elucidated.

61 To directly clarify the influence of passive cigarette smoking on IVD, we  
62 established a rat model of passive cigarette smoking. In passive cigarette smoking  
63 rats, slight structural changes were noted on haematoxylin-eosin and alcian blue +  
64 periodic acid-Schiff staining of the IVD tissue [25], and the expression of type I and  
65 IX collagen mRNA was reduced [26]. Comprehensive investigation with gene  
66 expression microarrays revealed increased expression of heat shock protein 70  
67 and protein tyrosine phosphatase (unpublished data). The expression of these  
68 genes was also increased in the isolated nucleus pulposus (NP) and annulus  
69 fibrosus (AF) [27], suggesting that the passive cigarette smoking-induced stress  
70 response occurs similarly in the NP and AF, and induces anti-apoptotic responses.  
71 Recently, we observed that passive cigarette smoking also changes the circadian  
72 rhythm of clock genes in rat IVD [28]. To further investigate the relationship  
73 between the morphological and molecular changes in passive cigarette smoking-  
74 induced IVD degeneration, we examined the histological changes and molecular  
75 events in the extracellular matrix (ECM) and chondrocytes of the IVD. Based on

76 these findings, we proposed a model of passive cigarette smoking-induced IVD  
77 degeneration in rats.

78

## 79 **Materials and Methods**

80

### 81 **Animals**

82 Twelve male, 8-week-old Sprague-Dawley rats (CLEA Japan, Inc., Tokyo,  
83 Japan) were subjected to passive cigarette smoking using our cigarette smoking  
84 device, which has been described previously [26, 28]. Rats underwent passive  
85 cigarette smoke exposure for 4 or 8 weeks, designated as the S4 and S8 groups,  
86 respectively (n=6/group). As the respective control groups, non-smoking control  
87 rats were established as the N4 and N8 groups, respectively (n=6/group).  
88 Euthanasia was performed under deep anaesthesia with intraperitoneal  
89 administration of 30 mg of pentobarbital sodium. After euthanasia, a longitudinal  
90 incision was made immediately above the dorsal spine and the entire spine was  
91 excised. The lumbar IVD were separated from the vertebrae and immediately  
92 frozen at -80°C. The lower thoracic vertebrae were also excised *en bloc*, fixed in  
93 10% formalin, decalcified with EDTA for 2 months and embedded in paraffin. The  
94 study protocol was approved by the Animal Experimentation Committee of the  
95 Nihon University School of Medicine.

96

### 97 **Immunohistochemistry and Specific Staining**

98 Thin paraffin-embedded sections (4 µm) were cut and treated with 600 U/ml  
99 of hyaluronidase (Sigma-Aldrich, St. Louis, USA) at 37°C for 1 hr to activate  
100 antigens. Sections were stained using the CSA II kit (Biotin-free catalysed signal  
101 amplification system; DAKO, Glostrup, Denmark) and 3,3'-diaminobenzidine (DAB).  
102 Type II collagen was detected using a mouse monoclonal antibody (10 µg/ml;  
103 Daiichi Fine Chemical, Toyama, Japan) and aggrecan was detected using a mouse

104 monoclonal antibody (10 µg/ml; Thermo Fisher Scientific, Massachusetts, USA) at  
105 37°C for 1 hr, followed by incubation with horse radish peroxidase (HRP)-labelled  
106 goat anti-mouse IgG (DAKO) at room temperature for 15 min. Haematoxylin was  
107 used for counterstaining. To quantify staining, the stained tissues were imaged  
108 under a microscope (OLYMPUS BX51, Tokyo, Japan) and the positive areas were  
109 measured using Win ROOF version 5.6 (Mitani, Co., Fukui, Japan). To evaluate  
110 the staining in each region, the tissue images were divided into the NP, the AF, and  
111 the peripheral and central regions of the cartilage end-plate (CEP). The percent  
112 areas that stained positive were calculated for each region (S1 Fig). Four IVD were  
113 observed for each of the 6 animals per group.

114 The above-described thin sections were subjected to Elastica van Gieson  
115 (EVG), safranin O and alcian blue staining, and positivity was evaluated. On  
116 safranin O staining, the red-stained area, representing acidic proteoglycan (PG) in  
117 the CEP, was measured using Win ROOF Version 5.6, and the percent positive  
118 area was calculated for the peripheral and central regions of the CEP (S1 Fig).

119

## 120 **DNA Fragmentation**

121 DNA fragmentation was detected by immunohistochemistry using an  
122 antibody against single-strand DNA (ssDNA). After blocking with 5% skim milk at  
123 37°C for 1 hr, the sections were incubated with anti-ssDNA rabbit IgG (Immuno-  
124 Biological Laboratories Co., Gunma, Japan) at 37°C for 1 hr, followed by reaction  
125 with HRP-labelled anti-rabbit IgG antibody (Immuno-Biological Laboratories Co.) at  
126 25°C for 30 min and colour development using DAB. Haematoxylin was used for  
127 counterstaining. Four IVD were observed for each of the 6 animals per group. The  
128 numbers of ssDNA-positive and -negative cells in the CEP were measured, and the  
129 positive rate was calculated by dividing the number of positive cells by the total  
130 number of cells. The specificity of the staining was confirmed using the thymus  
131 tissues from rats treated with and without dexamethasone.

132

## 133 **Statistical Analysis**

134 The Mann-Whitney U test was used to determine the significance of  
135 differences between two groups (group N4 vs. group S4, group N8 vs. group S8).  
136 Differences were considered significant when the  $p$ -values were less than 0.05.

137

## 138 **Results**

139

### 140 **Histological changes of the IVD induced by passive** 141 **cigarette smoking**

142 EVG staining was employed to investigate changes in the ECM of the IVD,  
143 and specifically demonstrated fibrous structural changes in the NP that were  
144 induced by passive cigarette smoking (Fig 1A). As expected, the AF and CEP were  
145 covered with collagen fibres, which stained red, and were not affected by passive  
146 cigarette smoking. In contrast, no red-staining of the collagen fibres was noted in  
147 the NP, and dark purple stained elastic fibres were present in the surrounding  
148 region, exhibiting a closed reticular structure. In the central region, NP cells  
149 (notochordal cells) containing pink-stained cytoplasm were present in clusters, and  
150 cytoplasm that appeared to outline vacuoles was evident in some cells. Passive  
151 cigarette smoking markedly altered these characteristic structures of the NP. In  
152 particular, marked destruction of the reticular structure and condensation of NP  
153 cells were observed after 8-weeks of passive cigarette smoking (Fig 1A). To  
154 identify the components of this reticular structure, safranin O and alcian blue  
155 staining, and immunostaining for type II collagen and aggrecan were performed for  
156 the IVD from the non-cigarette smoking rats (group N4) (Fig 1B). The reticular  
157 structures that stained dark purple on EVG staining were positive for all stains (i.e.,  
158 safranin O, alcian blue, type II collagen and aggrecan). Sulphated polysaccharide-  
159 containing PG and type II collagen fibres comprised the interstitium-supportive

160 structure in the NP (Fig 1B), which was destroyed by passive cigarette smoking  
161 (Fig 1A). We therefore investigated how the individual components of the NP  
162 interstitium were affected by passive cigarette smoking.

163

164 **Fig 1. Histological changes of the rat IVD induced by passive cigarette**

165 **smoking.** (A) EVG staining of IVD from control non-smoking (N4) and smoking  
166 (S4) rats for 4 weeks or 8 weeks (N8 and S8, respectively). Left and right panels  
167 represent low and high magnification, respectively. Bars in the left and right panels  
168 indicate 500  $\mu\text{m}$  and 100  $\mu\text{m}$ , respectively. NP, nucleus pulposus; AF, annulus  
169 fibrosus; CEP, cartilage end-plate. (B) Staining of NP of IVD from control non-  
170 smoking rat N4. a, EVG staining; b, safranin O staining; c, alcian blue staining; d,  
171 immunohistochemical staining for Type II collagen; e, immunohistochemical  
172 staining for aggrecan. Bar indicates 100  $\mu\text{m}$ .

173

174 Intense staining for type II collagen was observed in the reticular structure of  
175 the NP, which was consistent with the EVG staining (Fig 1B-a, 1B-d and 2A). Type  
176 II collagen-positive areas were subsequently evaluated in the NP, and compared  
177 between the S8 and N8 groups. Although the percent positive area decreased  
178 significantly in the S8 group (Fig 2B), no significant differences were noted in the  
179 AF (data not shown). Similarly, when the positive areas were measured in the  
180 CEP, significant decreases were observed in the central region in the S8 group  
181 (Fig 2B). Therefore, type II collagen expression was reduced in the NP and CEP.  
182 Synthesis ability was investigated by measuring mRNA expression, but no  
183 significant decreases were noted (S2A Fig and S1 Table). Moreover, there were no  
184 changes in the expression of the type II collagen-degrading enzyme, Mmp13 (S2A  
185 Fig and S1 Table). Intense staining for aggrecan was also observed in the  
186 interstitium-supportive structure in the NP, which decreased significantly in the S8  
187 group (Fig 3). Synthesis and degradation of aggrecan were also investigated at the

188 mRNA level. No changes were noted in the expression of aggrecan or Mmp3  
189 mRNA, but Adamts4 mRNA was reduced in both the 4- and 8-week passive  
190 cigarette smoking groups (S2B Fig).

191

192 **Fig 2. Immunohistochemical staining for type II collagen.** (A) Immunostaining  
193 for Type II collagen in the IVD from control non-smoking (N8) and smoking (S8)  
194 rats for 8 weeks. The IVD from N8 were stained without the primary antibody as a  
195 negative control. Left and right panels are low and high magnification, respectively.  
196 Bars indicate 500  $\mu\text{m}$  and 100  $\mu\text{m}$ , respectively. (B) The type II collagen-positive  
197 area was measured and the positive rate was calculated. NP, nucleus pulposus;  
198 CEP (central), central region of cartilage end-plate. The area of NP and CEP  
199 (central) is specified as shown in S1A and 1C Figs, respectively. *P*-values were  
200 determined by the Mann-Whitney U test.

201

202 **Fig 3. Immunohistochemical staining for aggrecan.** (A) Immunostaining for  
203 aggrecan in the IVD from control non-smoking (N8) and smoking (S8) rats for 8  
204 weeks. Left and right panels represent low and high magnification, respectively.  
205 Bars indicate 500  $\mu\text{m}$  and 100  $\mu\text{m}$ , respectively. (B) The aggrecan-positive area of  
206 the NP (nucleus pulposus) was measured and the positive rate was calculated.  
207 The area of NP is specified as shown in S1B Fig. *P*-values were determined by the  
208 Mann-Whitney U test.

209

210 Safranin O-stained IVD are shown in Fig 4. Passive cigarette smoking  
211 markedly affected the ECM staining of the CEP. The red staining of the acidic PG  
212 bound by safranin O was markedly reduced by passive cigarette smoking, whereas  
213 the green staining of non-collagen protein bound by fast green became more  
214 apparent. The quantitative results are shown in Fig 4B. The percent PG positive  
215 area decreased significantly in all regions of the CEP in both the 4- and 8-week



216 passive smoking groups compared with non-smoking controls. This led us to  
217 question the mechanism by which the PG decreased in the CEP in the early stage.  
218 Focusing on functional inactivation of chondrocytes in the CEP, we subsequently  
219 investigated apoptosis in these cells.

220

221 **Fig 4. Safranin O staining of rat IVD and CEP.** (A) Representative histological  
222 features from control non-smoking (N4) and smoking (S4) rats for 4 weeks or 8  
223 weeks (N8 and S8, respectively). Left and right panels represent low and high  
224 magnification, respectively. Bars indicate 500  $\mu\text{m}$  and 100  $\mu\text{m}$ , respectively. NP,  
225 nucleus pulposus; CEP, cartilage end-plate. (B) The safranin O-positive area of the  
226 CEP was measured and the positive rate was calculated. The CEP was divided  
227 into peripheral and central regions, and the safranin O-positive area was  
228 measured. CEP (peripheral, central), peripheral or central region of the CEP  
229 specified as shown in S1C Fig. *P*-values were determined by the Mann-Whitney U  
230 test.

231

## 232 **Induction of apoptosis in the CEP by passive cigarette** 233 **smoking**

234 Apoptosis was investigated using immunohistochemical staining for ssDNA.  
235 ssDNA-positive cells were present in the IVD tissues of healthy rats (S3 Fig).  
236 Specifically, 60% and 25% of chondrocytes were positive in the CEP in the S8 and  
237 N8 groups, respectively, demonstrating a significant increase in the S8 group.  
238 Similarly, the number of positive cells increased significantly in the S4 group  
239 compared with the N4 group (Fig 5). In contrast, no passive cigarette smoking-  
240 induced changes were noted in the NP or AF cells, although positive cells were  
241 present (S3 Fig). The lack of increase in apoptotic reactions was also confirmed by  
242 Western blotting for  $\beta$ -actin in the NP and AF (S4 Fig). Fragmentation of  $\beta$ -actin by  
243 caspase 3 was evident even in healthy IVD tissue (NP and AF); however, no

244 significant increases in response to passive cigarette smoking were found by  
245 quantitation of the fragmentation (S4 Fig). Furthermore, no significant changes in  
246 apoptosis-related gene expression were observed in the NP or AF in response to  
247 passive cigarette smoking (S1 Table). Apoptosis was observed to some extent  
248 even in healthy IVD cells, which was due to the disappearance and replacement of  
249 notochordal cells by chondrocyte-like cells with aging [29].

250

251 **Fig 5. Apoptotic reaction of the CEP induced by passive cigarette smoking.**

252 (A) Immunostaining for ssDNA of CEP from control non-smoking (N4) and smoking  
253 (S4) rats for 4 weeks or 8 weeks (N8 and S8, respectively). Arrows indicate  
254 representative cells with ssDNA-positive brown nuclei. The bar indicates 100  $\mu$ m.

255 (B) The numbers of ssDNA-positive and –negative cells in the CEP were measured  
256 and the positive rate was calculated. *P*-values were determined by the Mann-  
257 Whitney U test.

258

## 259 Discussion

260

261 Using this model, we previously observed that rat body weight gain was  
262 suppressed by passive cigarette smoking (S5 Fig). A similar effect was observed in  
263 rats allowed to self-administer nicotine, independent of food intake, which  
264 corresponded to 15 to 60 micrograms/kg/infusion nicotine [30]. We also measured  
265 blood nicotine levels in our previous study: 36.5 to 124.8 ng/ml (mean: 72.1 ng/ml)  
266 [25]. This concentration range corresponds to 10 to 70 ng/ml (mean: 33 ng/ml)  
267 reported for 330 human smokers who smoked 20.7 cigarettes/day on average [25,  
268 31]. Therefore, this model is comparable to humans who are smoking 20 to 40  
269 cigarettes/day. Under these exposure conditions, the NP architecture was  
270 destroyed by passive cigarette smoking and the supporting structure composed of  
271 the ECM had degenerated based on EVG staining. This supportive structure

272 comprised type II collagen and PG, which were both destroyed by passive cigarette  
273 smoking. Type II collagen and aggrecan were decreased at the protein level, but  
274 this was not supported by quantitative mRNA analysis. Although there were no  
275 increases of *Mmp13* or *Mmp3* mRNA in this study, *Adamts4* expression was  
276 slightly attenuated in the cigarette smoking groups. Activation of other degrading  
277 enzymes may have been involved in the decrease of these matrix proteins.  
278 Recently, Ngo *et al.* demonstrated that ADAMTS5 is the primary aggrecanase  
279 mediating smoking-induced IVD degeneration in mouse models of chronic tobacco  
280 smoking using *ADAMTS5*-deficient mice [32]. Thus, *ADAMTS5* may also be the  
281 enzyme responsible for the degradation in the current study. Wang *et al.* reported  
282 marked loss of disc matrix in a mouse cigarette smoking model using direct smoke  
283 inhalation [21]. As their model utilized direct vs. passive inhalation, the smoke  
284 conditions were more severe than those used in our study, and the degradation of  
285 aggrecan, and reduced synthesis of PG and collagen were also demonstrated.  
286 Thus, these findings support the conclusion that tobacco smoke alone is sufficient  
287 to affect peripheral tissues and lead to IVD degeneration.

288 PG and type II collagen were also decreased in the CEP following passive  
289 cigarette smoking. These structural constituents are produced and maintained by  
290 chondrocytes, suggesting that passive cigarette smoking inhibited cellular function  
291 in the CEP. We demonstrated that apoptotic responses of CEP cells were  
292 stimulated by passive cigarette smoking. In the CEP, the stimulation of apoptosis  
293 and reduction of the ECM may have both occurred in the early stage after 4 weeks  
294 of passive cigarette smoking. In contrast, in the NP, the reduction of the ECM was  
295 notable by the eighth week. This time lag suggests that early functional changes in  
296 the CEP are involved in the changes in the NP ECM. Arana *et al.* observed that  
297 when NP cells were co-cultured with cartilage tissue, expression of PG and type I  
298 and II collagen increased in the NP cells, and expression of ECM-degrading  
299 enzymes was decreased, suggesting that chondrocytes in the CEP maintain

300 homeostasis of the IVD tissue [33]. Similarly, in our study, the passive cigarette  
301 smoking-induced dysfunction of CEP cells may have led to the decrease in type II  
302 collagen and PG, and caused changes in the NP or changes in the architecture  
303 through NP cells. Ariga *et al.* also reported similar findings, i.e., aging-induced  
304 apoptosis and destruction of the CEP structure in mouse IVD, followed by NP and  
305 IVD degeneration [34]. Wang *et al.* reported that Fas receptor expression and  
306 apoptotic cells were increased in the CEP in addition to degeneration of human  
307 IVD [35]. These studies support the involvement of apoptosis of chondrocytes in  
308 the CEP during the course of IVD degeneration.

309         Based on this study, we hypothesized the following molecular mechanisms  
310 underlying IVD degeneration (Fig 6): 1) Passive cigarette smoking reduces blood  
311 flow, which most significantly influences the CEP. 2) Consequently, the potential for  
312 apoptosis is increased, and type II collagen and PG levels decrease around the  
313 chondrocytes. 3) This influence is transmitted to the NP, leading to further  
314 reduction of the production of type II collagen and PG. At the same time, structural  
315 changes of the NP cells and destruction of the tissue structure occurs. Regarding  
316 1), it has been reported that cigarette smoking induces carbon monoxide  
317 production, which promotes degradation of hypoxia inducible factor-1 (HIF-1 $\alpha$ ) and  
318 inhibits vascularization [36, 37]. Blood flow into the IVD was likely decreased in our  
319 passive cigarette smoking rat model due to vasoconstriction induced by nicotine.  
320 Regarding 2), it is well known that hypoxia and ischemia can cause apoptosis [38].  
321 HIF-2 $\alpha$  regulates Fas-mediated chondrocyte apoptosis during osteoarthritic  
322 cartilage destruction [39], and the expression of HIF-1 $\alpha$  has been reported to  
323 correlate significantly with apoptosis in human herniated discs [40]. As such,  
324 reduced blood flow-induced hypoxia may also have induced chondrocyte apoptosis  
325 in the CEP in our model. However, we did not assess mRNA expression in isolated  
326 CEP cells. Thus, further analyses of apoptosis-related gene expression in isolated  
327 CEP cells may more clearly demonstrate such changes, as observed in IVD cells.

328 Regarding 3), as similar findings have been reported [34], apoptosis of the CEP  
329 may lead to degeneration of the NP and IVD. Wang *et al.* suggested that the  
330 occurrence of Fas-mediated apoptosis, which is promoted within the CEP, is not  
331 unidirectional, but indeed represents mutual interactions between these tissues  
332 and cells [35]. Recently, Elmasry *et al.* suggested that both direct and indirect  
333 effects of smoking play significant roles in IVD degeneration: the nicotine-mediated  
334 down-regulation of cell proliferation and anabolism mainly affects GAG levels in the  
335 CEP, and the reduction of solute exchange between blood vessels and disc tissue  
336 mainly affects GAG levels and cell density in the NP [24]. Thus, there are possible  
337 alternative mechanisms responsible for the effects of cigarette smoke on the CEP  
338 and NP: the direct effects of nicotine on the CEP and the reduction of transport of  
339 nutrients through the CEP to the NP.

340

341 **Fig 6. Schema of the molecular mechanisms underlying IVD degeneration**  
342 **induced by passive cigarette smoking in rats.**

343

344 We demonstrated the possibility of chondrocyte apoptosis within the CEP of  
345 rat IVD in response to passive smoking. Changes were accompanied by decreases  
346 in type II collagen and PG in the NP, leading to destruction of the NP architecture.  
347 Apoptosis was suggested by the detection of chondrocytes that were positive for  
348 ssDNA; however, definitive morphological features of apoptosis were not observed  
349 in this study [41]. Therefore, further studies are needed to elucidate the extent of  
350 true apoptosis within this region of the IVD in rats exposed to passive cigarette  
351 smoking.

352

353 **Acknowledgements**

354

355           We thank Dr. Yoshiaki Kusumi for valuable discussions regarding the  
356 histological examination, and Rie Takahashi and Mika Sakamoto for their  
357 assistance in tissue staining.

## 359 **References**

360

- 361 1. Frymoyer JW, Pope MH, Costanza MC, Rosen JC, Goggin JE, Wilder DG.  
362 Epidemiologic studies of low-back pain. *Spine (Phila Pa 1976)*. 1980;5(5):419-  
363 23. PubMed PMID: 6450452.
- 364 2. Frymoyer JW, Pope MH, Clements JH, Wilder DG, MacPherson B, Ashikaga T.  
365 Risk factors in low-back pain. An epidemiological survey. *J Bone Joint Surg*  
366 *Am*. 1983;65(2):213-8. PubMed PMID: 6218171.
- 367 3. Frymoyer JW. Lumbar disk disease: epidemiology. *Instr Course Lect*.  
368 1992;41:217-23. PubMed PMID: 1534104.
- 369 4. Scott SC, Goldberg MS, Mayo NE, Stock SR, Poitras B. The association  
370 between cigarette smoking and back pain in adults. *Spine (Phila Pa 1976)*.  
371 1999;24(11):1090-8. Epub 1999/06/11. PubMed PMID: 10361658.
- 372 5. Goldberg MS, Scott SC, Mayo NE. A review of the association between  
373 cigarette smoking and the development of nonspecific back pain and related  
374 outcomes. *Spine (Phila Pa 1976)*. 2000;25(8):995-1014. PubMed PMID:  
375 10767814.
- 376 6. Kaila-Kangas L, Leino-Arjas P, Riihimaki H, Luukkonen R, Kirjonen J. Smoking  
377 and overweight as predictors of hospitalization for back disorders. *Spine (Phila*  
378 *Pa 1976)*. 2003;28(16):1860-8. Epub 2003/08/19. doi:  
379 10.1097/01.BRS.0000083284.47176.80. PubMed PMID: 12923477.
- 380 7. Mattila VM, Saarni L, Parkkari J, Koivusilta L, Rimpela A. Predictors of low  
381 back pain hospitalization--a prospective follow-up of 57,408 adolescents. *Pain*.  
382 2008;139(1):209-17. Epub 2008/05/13. doi: 10.1016/j.pain.2008.03.028.  
383 PubMed PMID: 18472217.
- 384 8. Mikkonen P, Leino-Arjas P, Remes J, Zitting P, Taimela S, Karppinen J. Is  
385 smoking a risk factor for low back pain in adolescents? A prospective cohort

- 386 study. *Spine (Phila Pa 1976)*. 2008;33(5):527-32. Epub 2008/03/05. doi:  
387 10.1097/BRS.0b013e3181657d3c. PubMed PMID: 18317198.
- 388 9. Shiri R, Karppinen J, Leino-Arjas P, Solovieva S, Viikari-Juntura E. The  
389 association between smoking and low back pain: a meta-analysis. *Am J Med*.  
390 2010;123(1):87 e7-35. Epub 2010/01/28. doi: 10.1016/j.amjmed.2009.05.028.  
391 PubMed PMID: 20102998.
- 392 10. Glassman SD, Anagnost SC, Parker A, Burke D, Johnson JR, Dimar JR. The  
393 effect of cigarette smoking and smoking cessation on spinal fusion. *Spine*  
394 (Phila Pa 1976). 2000;25(20):2608-15. Epub 2000/10/18. PubMed PMID:  
395 11034645.
- 396 11. Behrend C, Prasarn M, Coyne E, Horodyski M, Wright J, Rehtine GR.  
397 Smoking Cessation Related to Improved Patient-Reported Pain Scores  
398 Following Spinal Care. *J Bone Joint Surg Am*. 2012;94(23):2161-6. Epub  
399 2012/10/26. doi: 10.2106/JBJS.K.01598. PubMed PMID: 23095839.
- 400 12. Mattila VM, Saarni L, Parkkari J, Koivusilta L, Rimpela A. Early risk factors for  
401 lumbar discectomy: an 11-year follow-up of 57,408 adolescents. *Eur Spine J*.  
402 2008;17(10):1317-23. Epub 2008/08/07. doi: 10.1007/s00586-008-0738-2.  
403 PubMed PMID: 18682991; PubMed Central PMCID: PMC2556481.
- 404 13. Kelsey JL, Githens PB, O'Conner T, Weil U, Calogero JA, Holford TR, et al.  
405 Acute prolapsed lumbar intervertebral disc. An epidemiologic study with special  
406 reference to driving automobiles and cigarette smoking. *Spine (Phila Pa 1976)*.  
407 1984;9(6):608-13. Epub 1984/09/01. PubMed PMID: 6495031.
- 408 14. Heliövaara M, Makela M, Knekt P, Impivaara O, Aromaa A. Determinants of  
409 sciatica and low-back pain. *Spine (Phila Pa 1976)*. 1991;16(6):608-14. Epub  
410 1991/06/01. PubMed PMID: 1830689.
- 411 15. Pye SR, Reid DM, Adams JE, Silman AJ, O'Neill TW. Influence of weight, body  
412 mass index and lifestyle factors on radiographic features of lumbar disc  
413 degeneration. *Ann Rheum Dis*. 2007;66(3):426-7. Epub 2007/02/22. doi:



- 414 10.1136/ard.2006.057166. PubMed PMID: 17311902; PubMed Central PMCID:  
415 PMC1856022.
- 416 16. Miller VM, Clouse WD, Tonnessen BH, Boston US, Severson SR, Bonde S, et  
417 al. Time and dose effect of transdermal nicotine on endothelial function. *Am J*  
418 *Physiol Heart Circ Physiol*. 2000;279(4):H1913-21. PubMed PMID: 11009480.
- 419 17. Ernst E. Smoking, a cause of back trouble? *Br J Rheumatol*. 1993;32(3):239-  
420 42. PubMed PMID: 8448616.
- 421 18. Iwahashi M, Matsuzaki H, Tokuhashi Y, Wakabayashi K, Uematsu Y.  
422 Mechanism of intervertebral disc degeneration caused by nicotine in rabbits to  
423 explicate intervertebral disc disorders caused by smoking. *Spine (Phila Pa*  
424 *1976)*. 2002;27(13):1396-401. PubMed PMID: 12131735.
- 425 19. Akmal M, Kesani A, Anand B, Singh A, Wiseman M, Goodship A. Effect of  
426 nicotine on spinal disc cells: a cellular mechanism for disc degeneration. *Spine*  
427 *(Phila Pa 1976)*. 2004;29(5):568-75. PubMed PMID: 15129075.
- 428 20. Vo N, Wang D, Sowa G, Witt W, Ngo K, Coelho P, et al. Differential effects of  
429 nicotine and tobacco smoke condensate on human annulus fibrosus cell  
430 metabolism. *J Orthop Res*. 2011;29(10):1585-91. Epub 2011/03/31. doi:  
431 10.1002/jor.21417. PubMed PMID: 21448984.
- 432 21. Wang D, Nasto LA, Roughley P, Leme AS, Houghton AM, Usas A, et al. Spine  
433 degeneration in a murine model of chronic human tobacco smokers.  
434 *Osteoarthritis Cartilage*. 2012;20(8):896-905. Epub 2012/04/26. doi:  
435 10.1016/j.joca.2012.04.010. PubMed PMID: 22531458; PubMed Central  
436 PMCID: PMC3389285.
- 437 22. Nasto LA, Ngo K, Leme AS, Robinson AR, Dong Q, Roughley P, et al.  
438 Investigating the role of DNA damage in tobacco smoking-induced spine  
439 degeneration. *Spine J*. 2014;14(3):416-23. Epub 2013/11/12. doi:  
440 10.1016/j.spinee.2013.08.034. PubMed PMID: 24211096; PubMed Central  
441 PMCID: PMC3944725.

- 442 23. Kepler CK, Ponnappan RK, Tannoury CA, Risbud MV, Anderson DG. The  
443 molecular basis of intervertebral disc degeneration. *Spine J.* 2013;13(3):318-  
444 30. Epub 2013/03/30. doi: 10.1016/j.spinee.2012.12.003. PubMed PMID:  
445 23537454.
- 446 24. Elmasry S, Asfour S, de Rivero Vaccari JP, Travascio F. Effects of Tobacco  
447 Smoking on the Degeneration of the Intervertebral Disc: A Finite Element  
448 Study. *PLoS One.* 2015;10(8):e0136137. doi: 10.1371/journal.pone.0136137.  
449 PubMed PMID: 26301590; PubMed Central PMCID: PMC4547737.
- 450 25. Oda H, Matsuzaki H, Tokuhashi Y, Wakabayashi K, Uematsu Y, Iwahashi M.  
451 Degeneration of intervertebral discs due to smoking: experimental assessment  
452 in a rat-smoking model. *J Orthop Sci.* 2004;9(2):135-41. PubMed PMID:  
453 15045541.
- 454 26. Uei H, Matsuzaki H, Oda H, Nakajima S, Tokuhashi Y, Esumi M. Gene  
455 expression changes in an early stage of intervertebral disc degeneration  
456 induced by passive cigarette smoking. *Spine (Phila Pa 1976).* 2006;31(5):510-  
457 4. PubMed PMID: 16508543.
- 458 27. Ogawa T, Matsuzaki H, Uei H, Nakajima S, Tokuhashi Y, Esumi M. Alteration  
459 of gene expression in intervertebral disc degeneration of passive cigarette-  
460 smoking rats: separate quantitation in separated nucleus pulposus and annulus  
461 fibrosus. *Pathobiology.* 2005;72(3):146-51. PubMed PMID: 15860932.
- 462 28. Numaguchi S, Esumi M, Sakamoto M, Endo M, Ebihara T, Soma H, et al.  
463 Passive cigarette smoking changes the circadian rhythm of clock genes in rat  
464 intervertebral discs. *J Orthop Res.* 2016;34(1):39-47. doi: 10.1002/jor.22941.  
465 PubMed PMID: 25939642.
- 466 29. Hunter CJ, Matyas JR, Duncan NA. The notochordal cell in the nucleus  
467 pulposus: a review in the context of tissue engineering. *Tissue Eng.*  
468 2003;9(4):667-77. Epub 2003/09/19. doi: 10.1089/107632703768247368.  
469 PubMed PMID: 13678445.

- 470 30. Rupperecht LE, Smith TT, Donny EC, Sved AF. Self-Administered Nicotine  
471 Suppresses Body Weight Gain Independent of Food Intake in Male Rats.  
472 Nicotine Tob Res. 2016;18(9):1869-76. doi: 10.1093/ntr/ntw113. PubMed  
473 PMID: 27194544; PubMed Central PMCID: PMC4978984.
- 474 31. Daffner SD, Waugh S, Norman TL, Mukherjee N, France JC. Effect of serum  
475 nicotine level on posterior spinal fusion in an in vivo rabbit model. Spine J.  
476 2015;15(6):1402-8. doi: 10.1016/j.spinee.2015.02.041. PubMed PMID:  
477 25725367.
- 478 32. Ngo K, Pohl P, Wang D, Leme AS, Lee J, Di P, et al. ADAMTS5 Deficiency  
479 Protects Mice From Chronic Tobacco Smoking-induced Intervertebral Disc  
480 Degeneration. Spine (Phila Pa 1976). 2017;42(20):1521-8. doi:  
481 10.1097/BRS.0000000000002258. PubMed PMID: 28570296; PubMed Central  
482 PMCID: PMC5633483.
- 483 33. Arana CJ, Diamandis EP, Kandel RA. Cartilage tissue enhances proteoglycan  
484 retention by nucleus pulposus cells in vitro. Arthritis Rheum. 2010;62(11):3395-  
485 403. Epub 2010/07/28. doi: 10.1002/art.27651. PubMed PMID: 20662071.
- 486 34. Ariga K, Miyamoto S, Nakase T, Okuda S, Meng W, Yonenobu K, et al. The  
487 relationship between apoptosis of endplate chondrocytes and aging and  
488 degeneration of the intervertebral disc. Spine (Phila Pa 1976).  
489 2001;26(22):2414-20. PubMed PMID: 11707702.
- 490 35. Wang F, Jiang JM, Deng CH, Wang FL, Fu ZZ, Zhang ZF. Expression of Fas  
491 receptor and apoptosis in vertebral endplates with degenerative disc diseases  
492 categorized as Modic type I or II. Injury. 2011;42(8):790-5. Epub 2011/03/02.  
493 doi: 10.1016/j.injury.2011.01.034. PubMed PMID: 21356536.
- 494 36. Huang LE, Willmore WG, Gu J, Goldberg MA, Bunn HF. Inhibition of hypoxia-  
495 inducible factor 1 activation by carbon monoxide and nitric oxide. Implications  
496 for oxygen sensing and signaling. J Biol Chem. 1999;274(13):9038-44.  
497 PubMed PMID: 10085152.

- 498 37. Michaud SE, Menard C, Guy LG, Gennaro G, Rivard A. Inhibition of hypoxia-  
499 induced angiogenesis by cigarette smoke exposure: impairment of the HIF-  
500 1alpha/VEGF pathway. *FASEB J.* 2003;17(9):1150-2. PubMed PMID:  
501 12709416.
- 502 38. Goldenberg-Cohen N, Raiter A, Gaydar V, Dratviman-Storobinsky O, Goldstein  
503 T, Weizman A, et al. Peptide-binding GRP78 protects neurons from hypoxia-  
504 induced apoptosis. *Apoptosis.* 2012;17(3):278-88. Epub 2011/11/29. doi:  
505 10.1007/s10495-011-0678-x. PubMed PMID: 22120956.
- 506 39. Ryu JH, Shin Y, Huh YH, Yang S, Chun CH, Chun JS. Hypoxia-inducible  
507 factor-2alpha regulates Fas-mediated chondrocyte apoptosis during  
508 osteoarthritic cartilage destruction. *Cell Death Differ.* 2012;19(3):440-50. Epub  
509 2011/08/27. doi: 10.1038/cdd.2011.111. PubMed PMID: 21869830; PubMed  
510 Central PMCID: PMC3278727.
- 511 40. Ha KY, Koh IJ, Kirpalani PA, Kim YY, Cho YK, Khang GS, et al. The  
512 expression of hypoxia inducible factor-1alpha and apoptosis in herniated discs.  
513 *Spine (Phila Pa 1976).* 2006;31(12):1309-13. PubMed PMID: 16721291.
- 514 41. Elmore SA, Dixon D, Hailey JR, Harada T, Herbert RA, Maronpot RR, et al.  
515 Recommendations from the INHAND Apoptosis/Necrosis Working Group.  
516 *Toxicol Pathol.* 2016;44(2):173-88. Epub 2016/02/18. doi:  
517 10.1177/0192623315625859. PubMed PMID: 26879688; PubMed Central  
518 PMCID: PMCPMC4785073.
- 519

## 520 **Supporting information**

### 521 **S1 Fig. Measurement area for histological examination.**

522 (A) Immunohistochemistry for type II collagen. (B) Immunohistochemistry for  
523 aggrecan. (C) Safranin O staining. The upper and lower sides of each panel  
524 represent the cranial and caudal directions, respectively. The left and right sides of  
525 each panel represent the ventral and dorsal directions, respectively. The positive  
526 NP area ratio was the ratio of the positive area to the entire NP, and the positive  
527 AF area ratio was the ratio of the positive area to the dorsal AF with a diameter of  
528 300  $\mu\text{m}$ . The CEP was divided into the peripheral and central regions, and the  
529 positive area percentage was calculated in each region. The bar indicates 200  $\mu\text{m}$ .

530

### 531 **S2 Fig. Quantitative mRNA analysis.**

532 (A) Type II collagen and Mmp13 mRNA. (B) Aggrecan, Mmp3, and Adamts4  
533 mRNA. Two IVD were excised from each rat and homogenized in TRIZOL  
534 (Invitrogen, Carlsbad, USA) to extract total RNA. The extracted RNA was treated  
535 with DNase I, and then reacted with random hexamer primers and Prime Script  
536 reverse transcriptase (TAKARA, Kyoto, Japan) at 30°C for 10 min, 45°C for 60 min,  
537 and 70°C for 15 min to synthesize cDNA. Using the TaqMan® Gene Expression  
538 Assay (Applied Biosystems, Foster, USA), PCR was performed according to the  
539 manufacturer's instructions using a Rotor-Gene 6000 real-time analyzer (Corbett  
540 Life Science QIAGEN, Alabama, USA). 18S rRNA was measured as an  
541 endogenous control for correction of the gene expression levels. For quantification,  
542 the absolute quantification method was employed, in which a calibration curve was  
543 prepared for each gene from 5-fold serial dilutions using cDNA with the highest  
544 expression level as the standard. The measured expression level of each gene  
545 was divided by the measured 18S rRNA expression level to calculate the  
546 normalized value. This normalized value was compared between the groups. The  
547 significance of the differences was analyzed using the Mann-Whitney U test.

548

549 **S3 Fig. Immunostaining for ssDNA in the NP and AF.**

550 Left and right panels represent low and high magnification, respectively. Bars  
551 indicate 1 mm and 200  $\mu$ m, respectively. N4, non-smoking control for 4 weeks; S4,  
552 passive smoking for 4 weeks; N8, non-smoking control for 8 weeks; S8, passive  
553 smoking for 8 weeks.

554

555 **S4 Fig. Fragmentation of  $\beta$ -actin.**

556 (A) Cleavage sites of caspase 1 and caspase 3 in rat  $\beta$ -actin. The forty-two-kDa  $\beta$ -  
557 actin is cleaved by caspases-1 at 2 aspartic acid (Asp) residues at positions 11 and  
558 244, producing a 29-kDa fragment. It is also cut at Asp 244 by caspase 3 to  
559 produce a 32-kDa fragment. The thick bar from amino acid residues 1 to 100  
560 indicates the epitope of the anti- $\beta$ -actin antibody used in this study. (B) Immunoblot  
561 analysis of  $\beta$ -actin from the IVD (NP and AF). Three IVD from each of 5 rats were  
562 combined, and protein was extracted. The IVD were mechanically ground using a  
563 mortar, cooled in liquid nitrogen, and extracted with shaking in 1 ml of guanidine  
564 hydrochloride extraction solution (4 M guanidine HCl, 50 mM sodium acetate, 65  
565 mM DTT, 10 mM EDTA, Complete Mini Protease Inhibitor Cocktail (Roche), pH  
566 8.5) at 4°C overnight. After centrifugation at 30,000( $x g$ ) for 5 min, precipitated  
567 collagen fibers were removed, and the supernatant was centrifuged again to  
568 remove macromolecular proteins that were 100 kDa or larger using a 100 kDa  
569 molecular weight cut off centrifugal filter (Millipore, CA, USA). The filtrate was used  
570 as the protein extract. The extract was mixed with 9 volumes of 100% ethanol to  
571 precipitate any protein. The precipitate was washed and resolved with 1xSDS-  
572 PAGE loading buffer. Forty  $\mu$ g of protein was applied to a 12.5% polyacrylamide  
573 gel and electrophoresed, followed by blotting onto a nitrocellulose membrane using  
574 the iBlot Dry Blotting System (Carlsbad, USA). The membrane was blocked with  
575 5% skim milk/PBS at room temperature for one hour and then reacted with 0.3

576  $\mu\text{g/ml}$  of mouse monoclonal anti- $\beta$ -actin antibody (Abcam, Cambridge, UK) at room  
577 temperature for one hour, followed by reaction with  $0.02 \mu\text{g/ml}$  of HRP-conjugated  
578 anti-mouse IgG goat antibody at room temperature for 30 minutes.  
579 Chemiluminescence was induced using ECL Advance (GE Healthcare,  
580 Buckingham, UK) and detected using Light-Capture (Atto, Tokyo, Japan). Two  
581 bands corresponding to  $\beta$ -actin, 42- and 32-kDa, were also detected in the IVD in  
582 the non-smoking control groups, suggesting that physiological cleavage of  $\beta$ -actin  
583 by caspase 3 occurs in the normal rat IVD. N4, non-smoking control for 4 weeks;  
584 S4, passive smoking for 4 weeks; N8, non-smoking control for 8 weeks; S8,  
585 passive smoking for 8 weeks. (C) Quantification of immunoblotting for  $\beta$ -actin.  
586 Immunoblot signals were subjected to molecular weight measurement and  
587 quantitative analysis using CS Analyzer 2.0 (Atto) and MultiGauge (FUJIFILM,  
588 Tokyo, Japan), respectively. The proportion of  $\beta$ -actin fragmentation by caspase 3  
589 was calculated. Passive cigarette smoking did not induce any change in the  
590 fragmentation rate.

591

592 **S5 Fig. Rat body weight during passive cigarette smoking (grey) compared**  
593 **with that of non-smoking control (white).**

594 \* indicates significant decrease in body weight gain in smoking rats ( $p < 0.05$  by  
595 Mann-Whitney U test).

596

597 **S1 Table. Comparison of mRNA levels in the intervertebral disc (IVD) between**  
598 **passive smoking and non-smoking control rats.**

599

600

N4

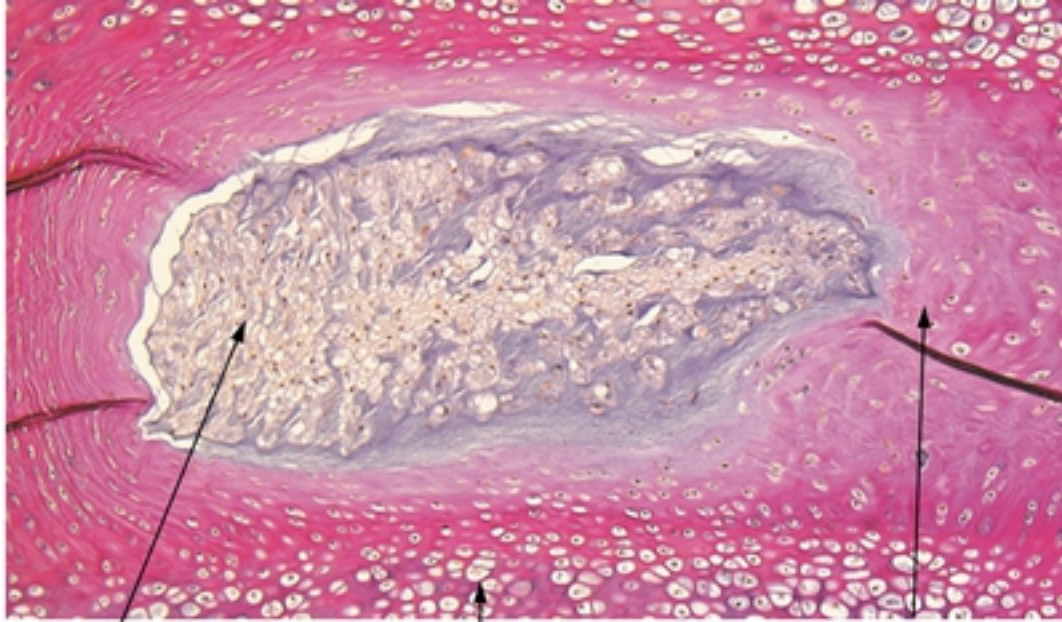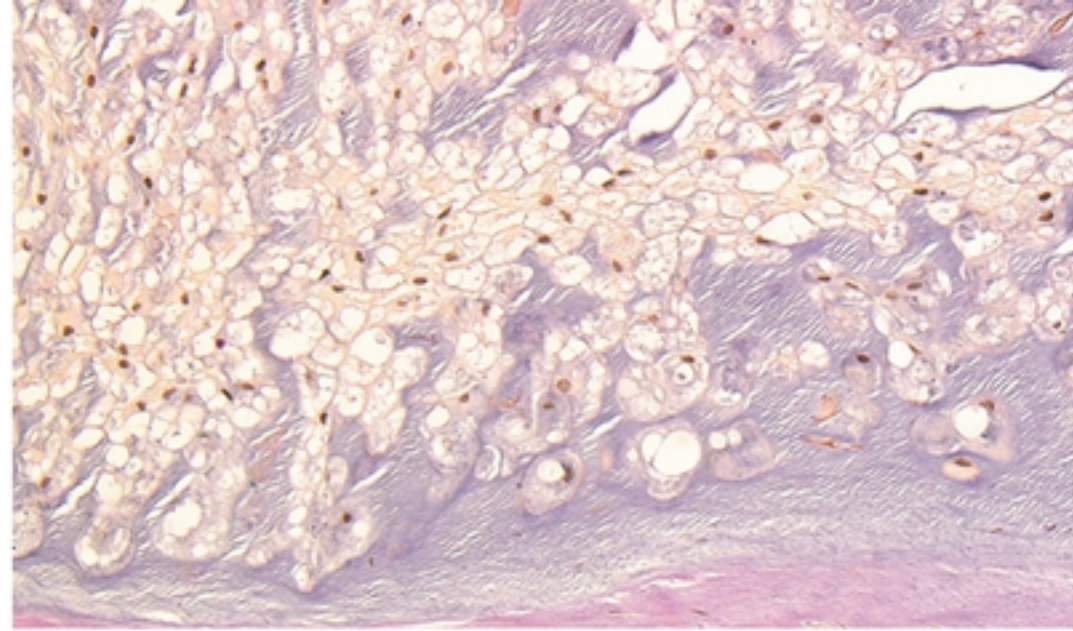

bioRxiv preprint doi: <https://doi.org/10.1101/656876>; this version posted May 31, 2019. The copyright holder for this preprint (which was not certified by peer review) is the author/funder, who has granted bioRxiv a license to display the preprint in perpetuity. It is made available under aCC-BY 4.0 International license.

NP CEP AF

S4

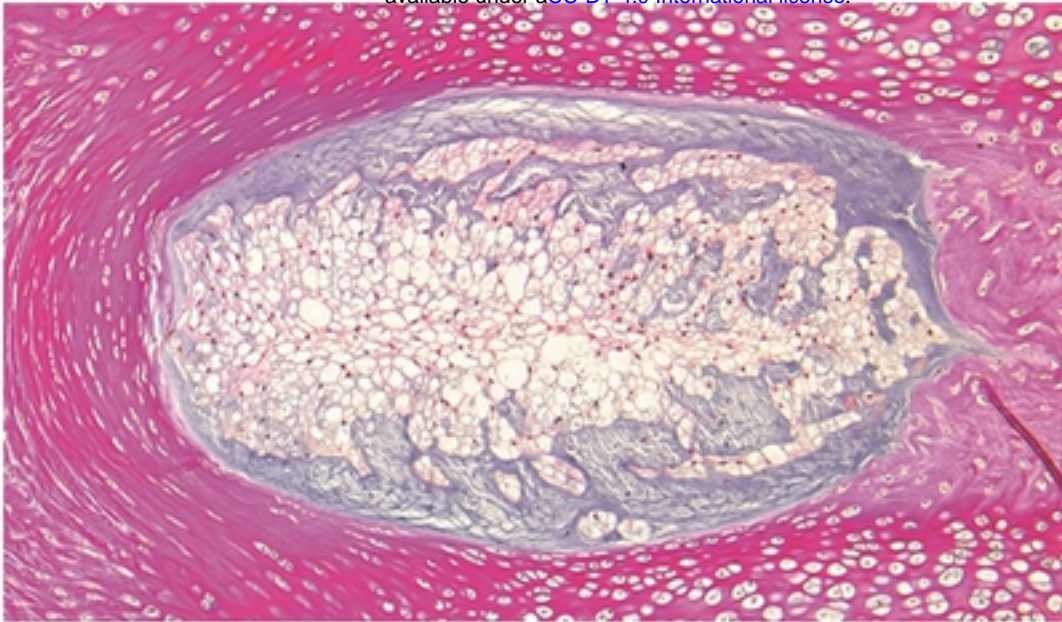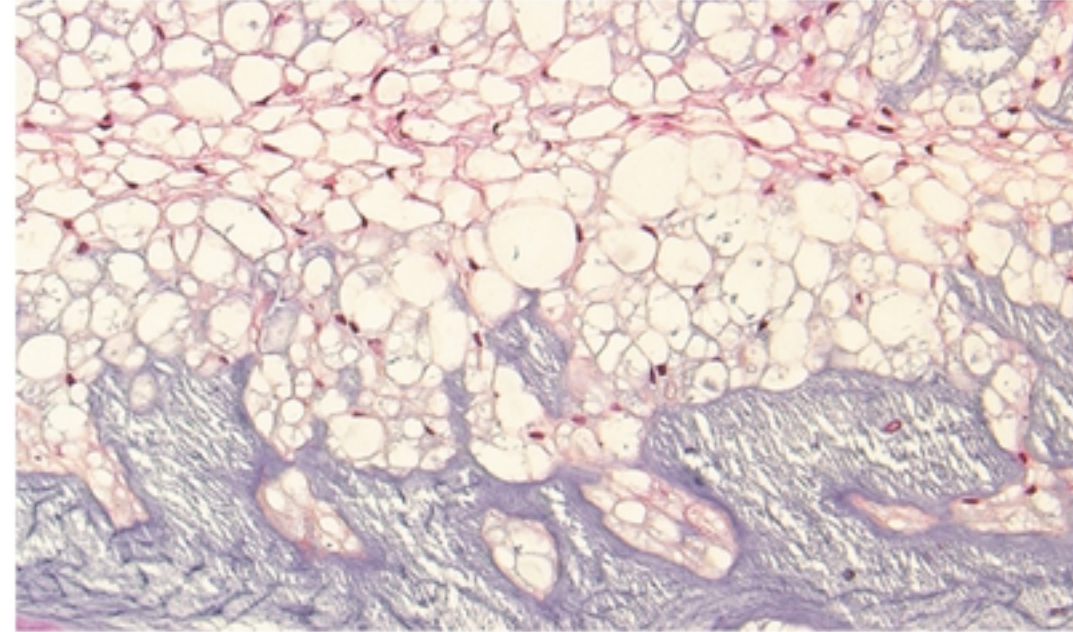

N8

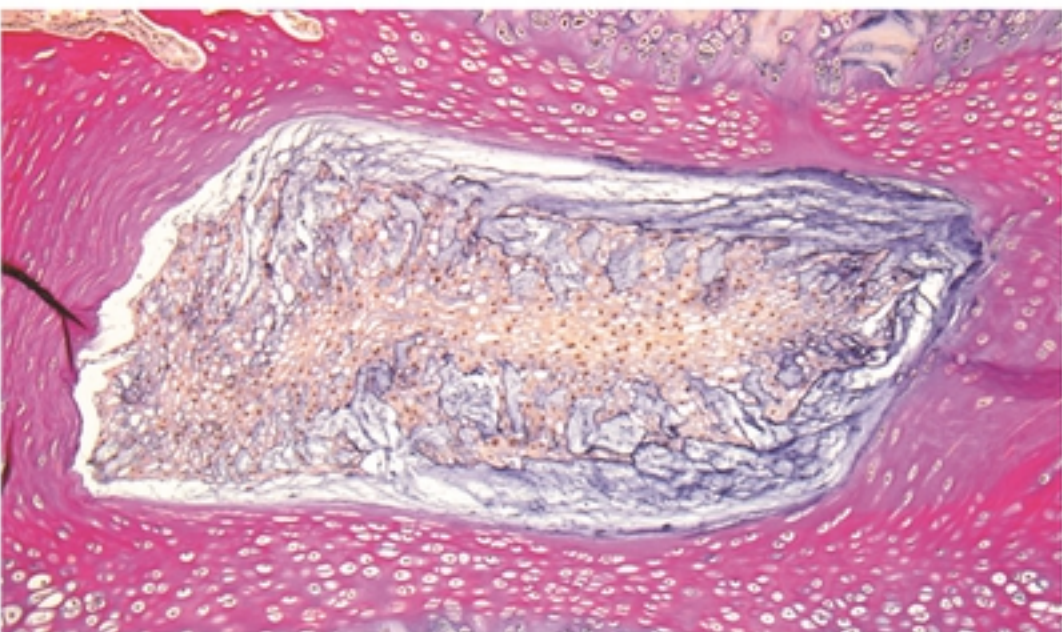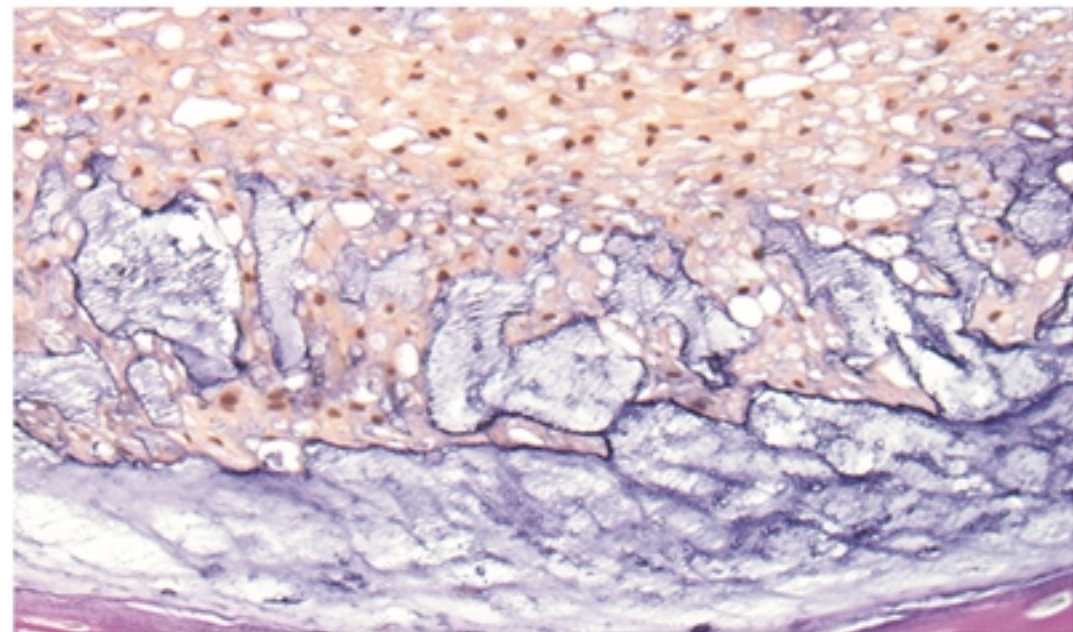

S8

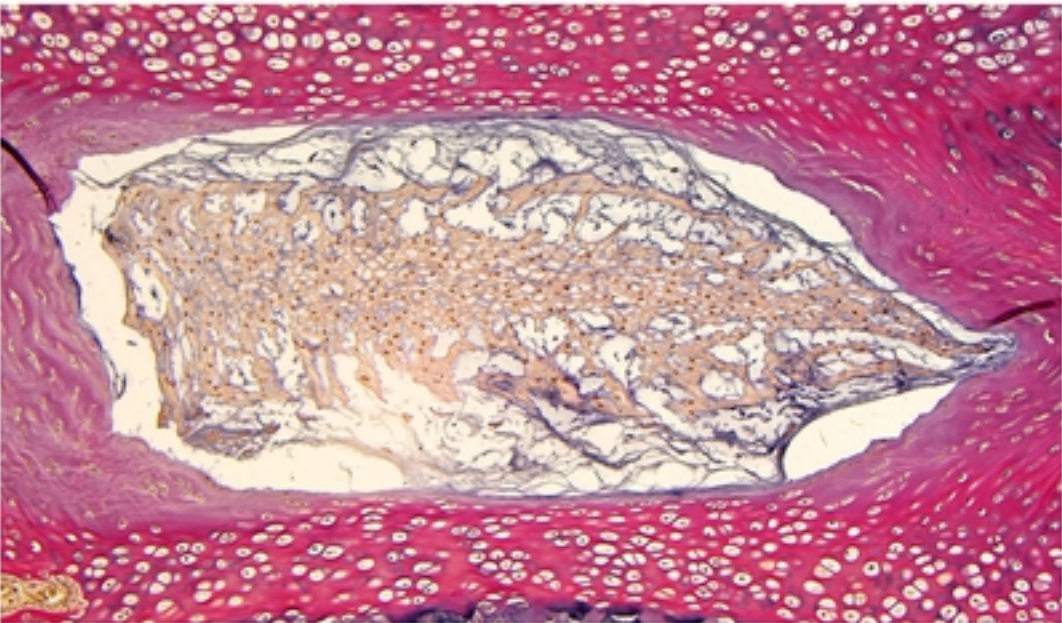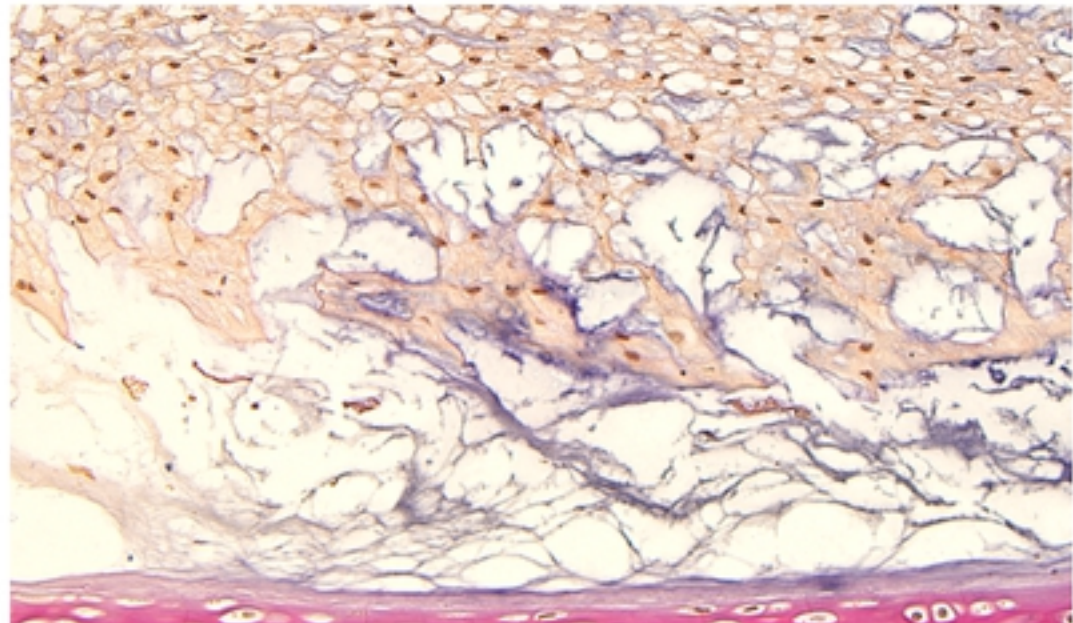

Fig1A



**a**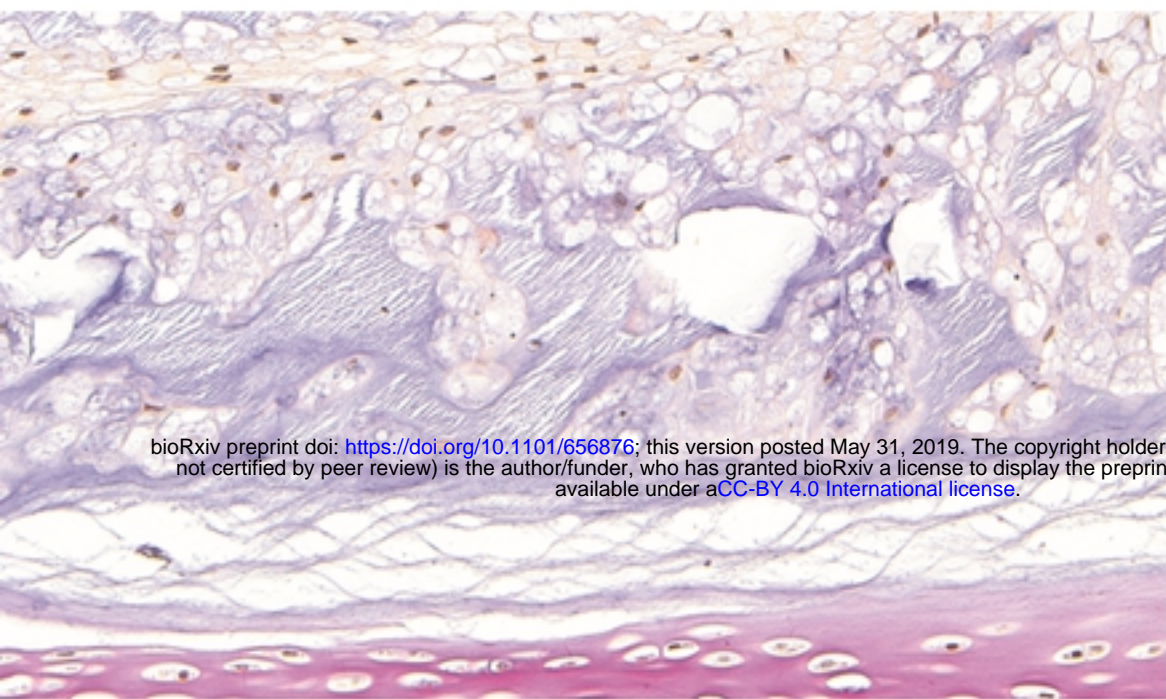**b**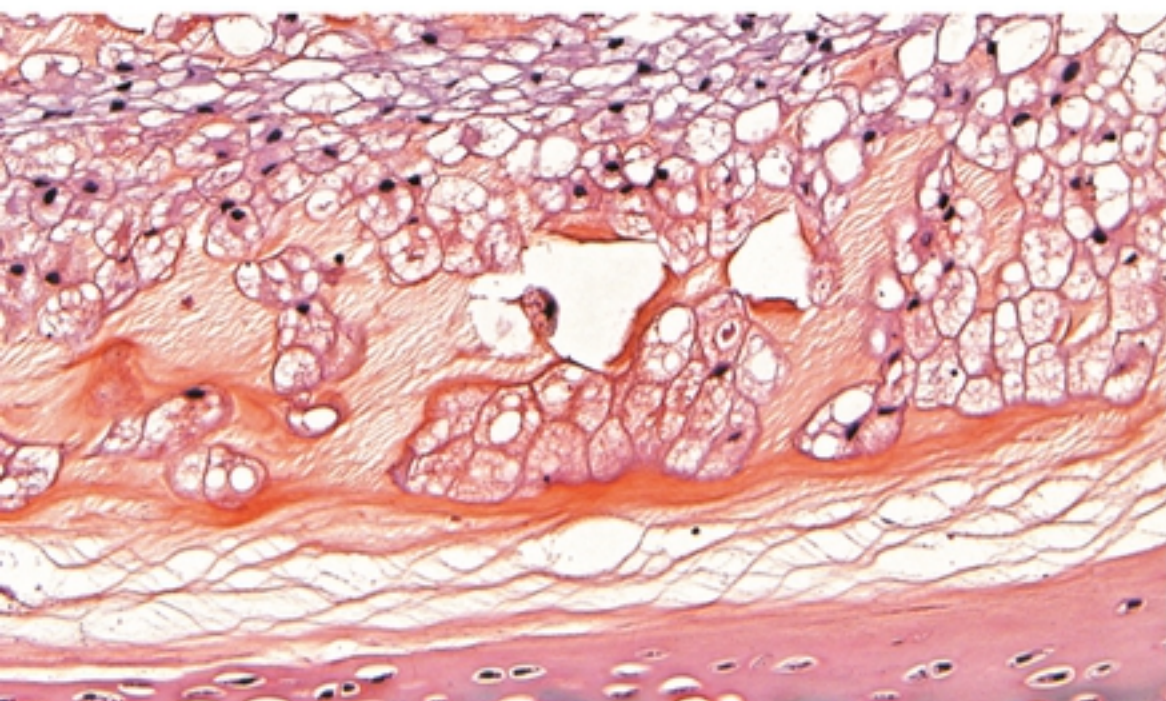**c**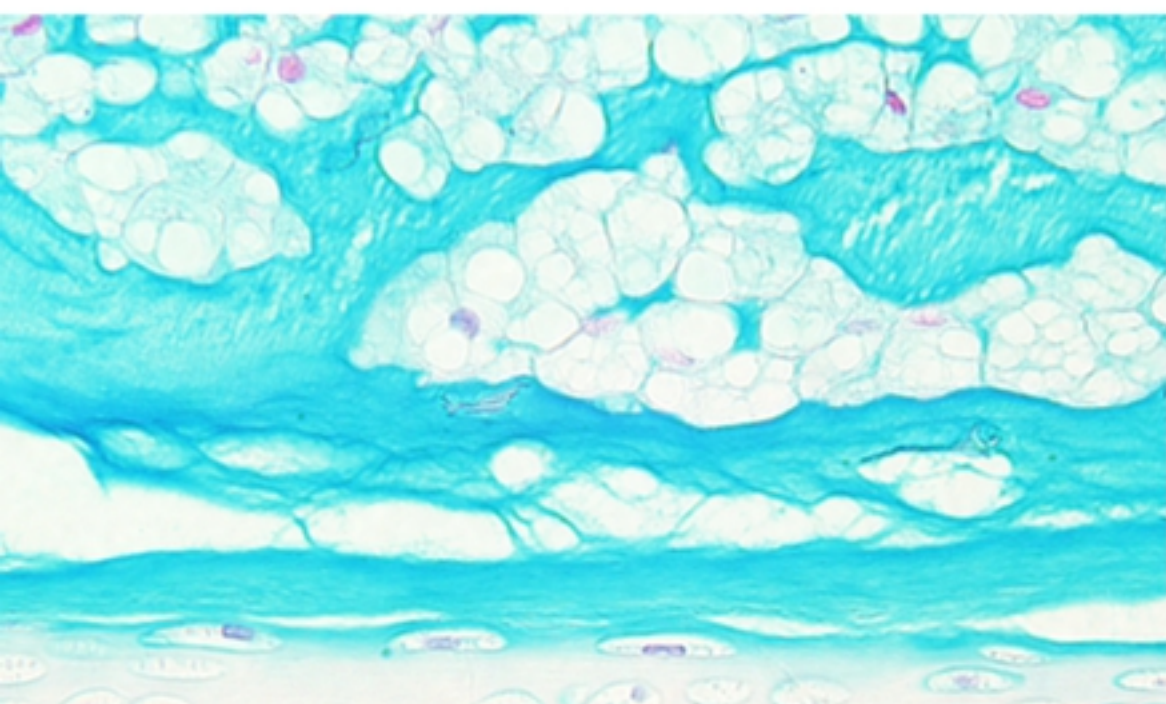**d**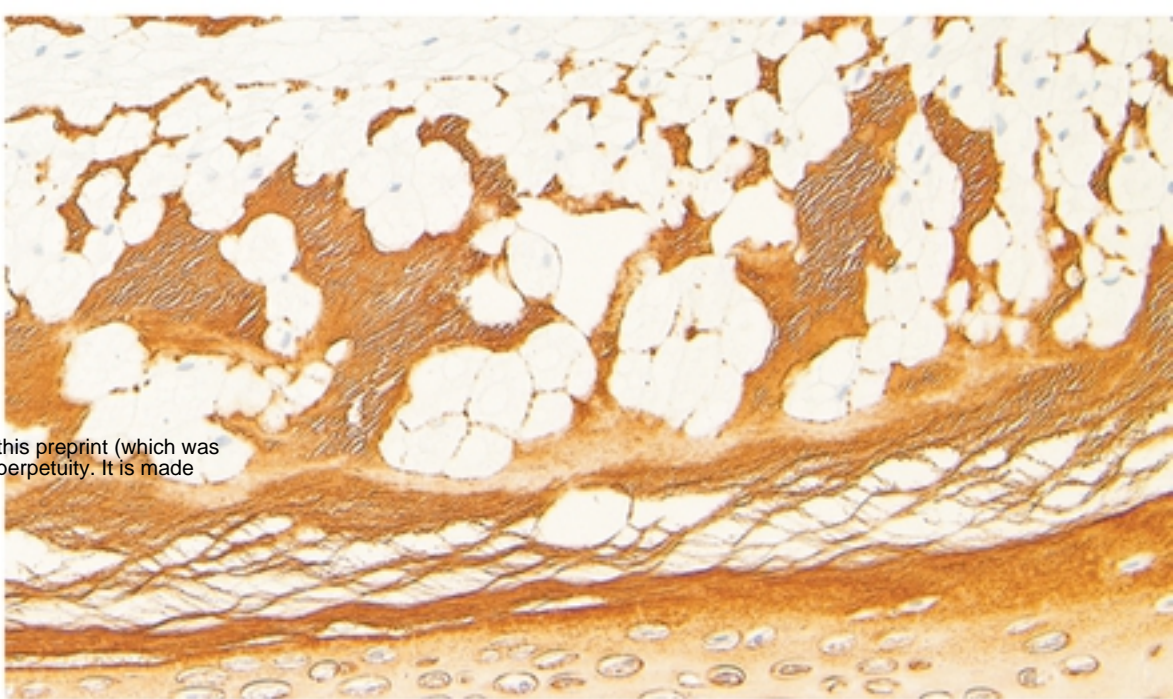**e**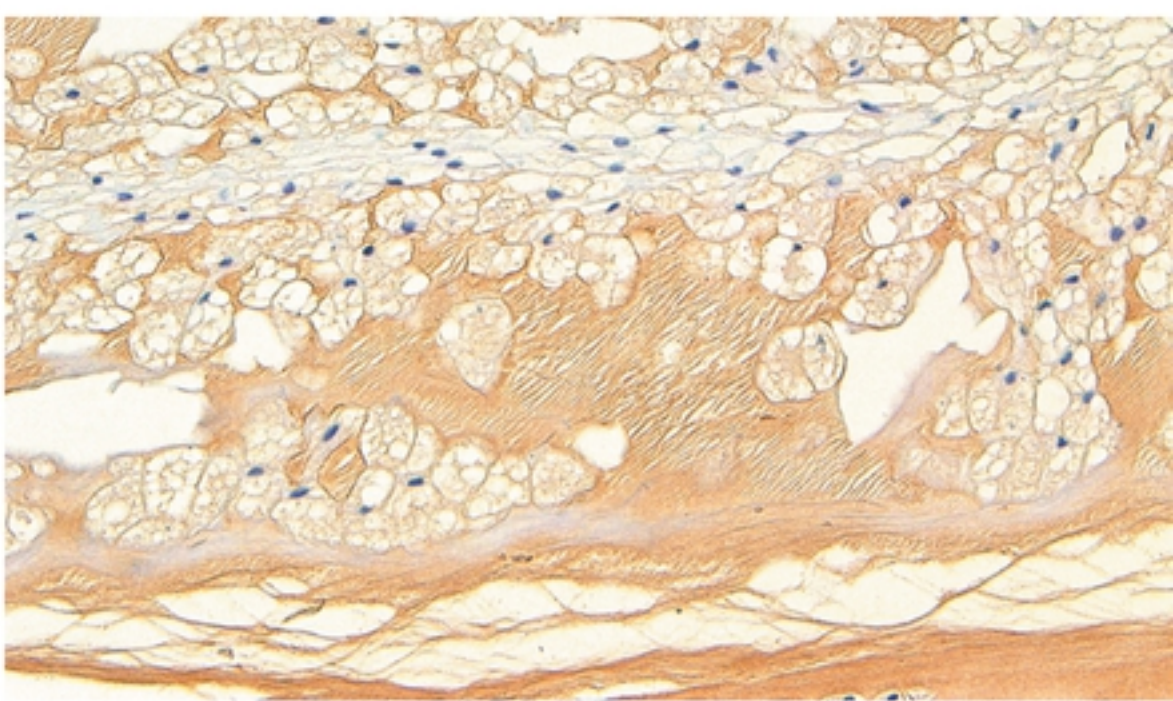**Fig1 B**

# N8

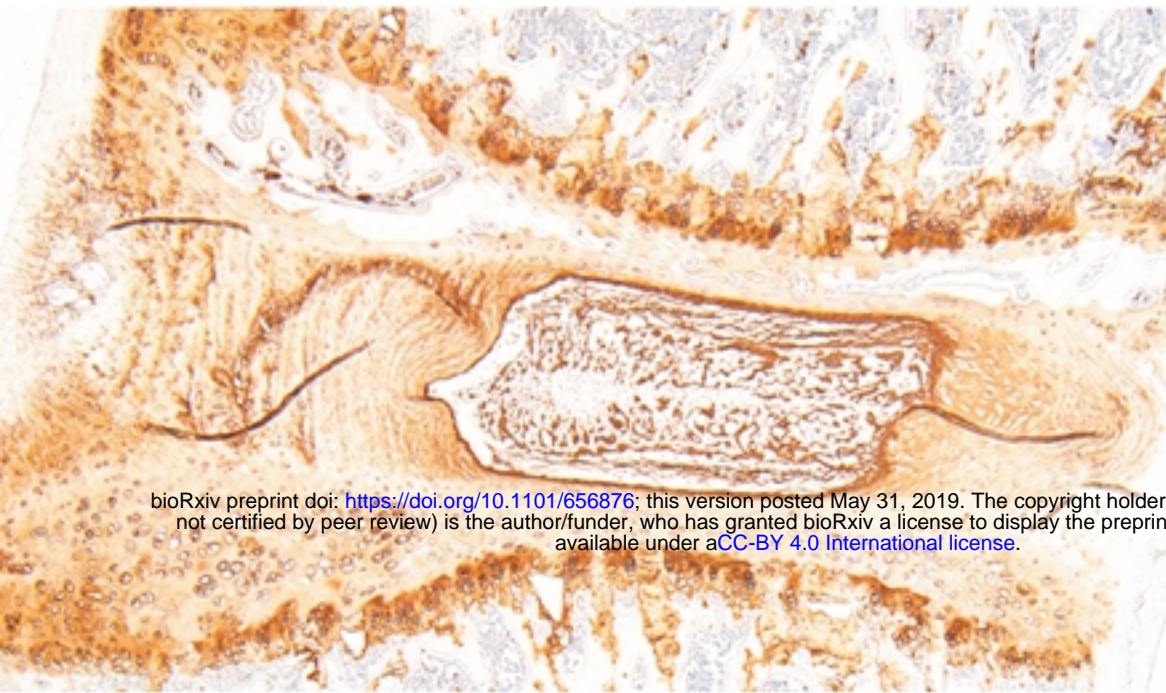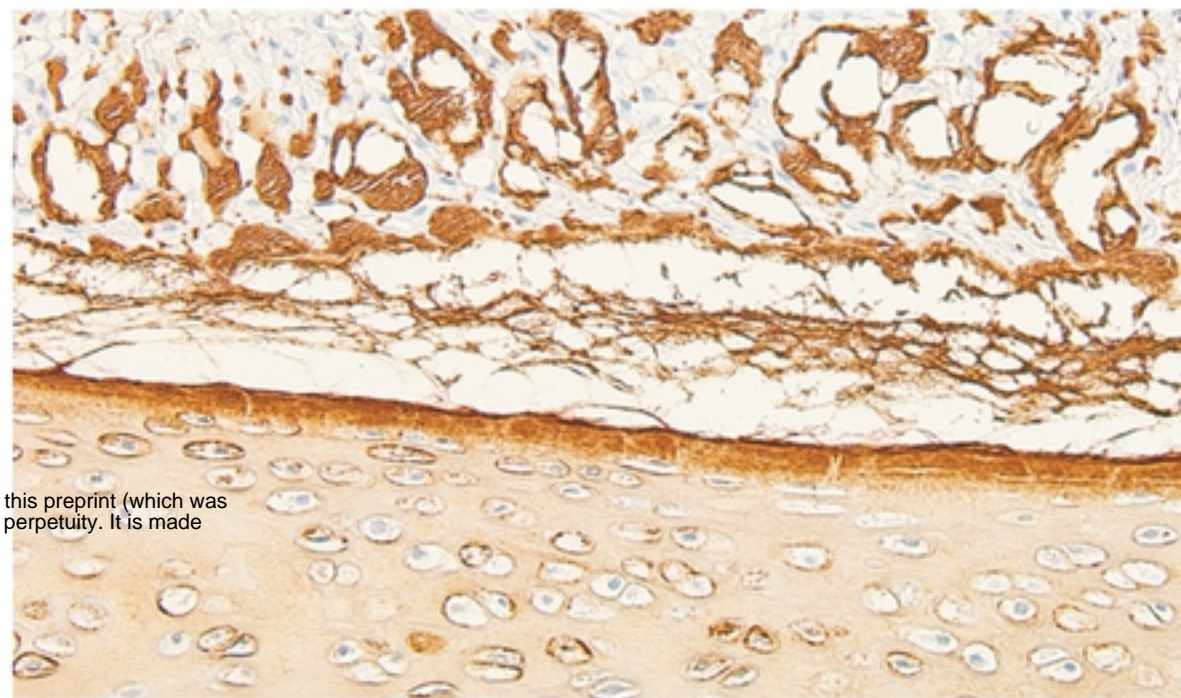

# S8

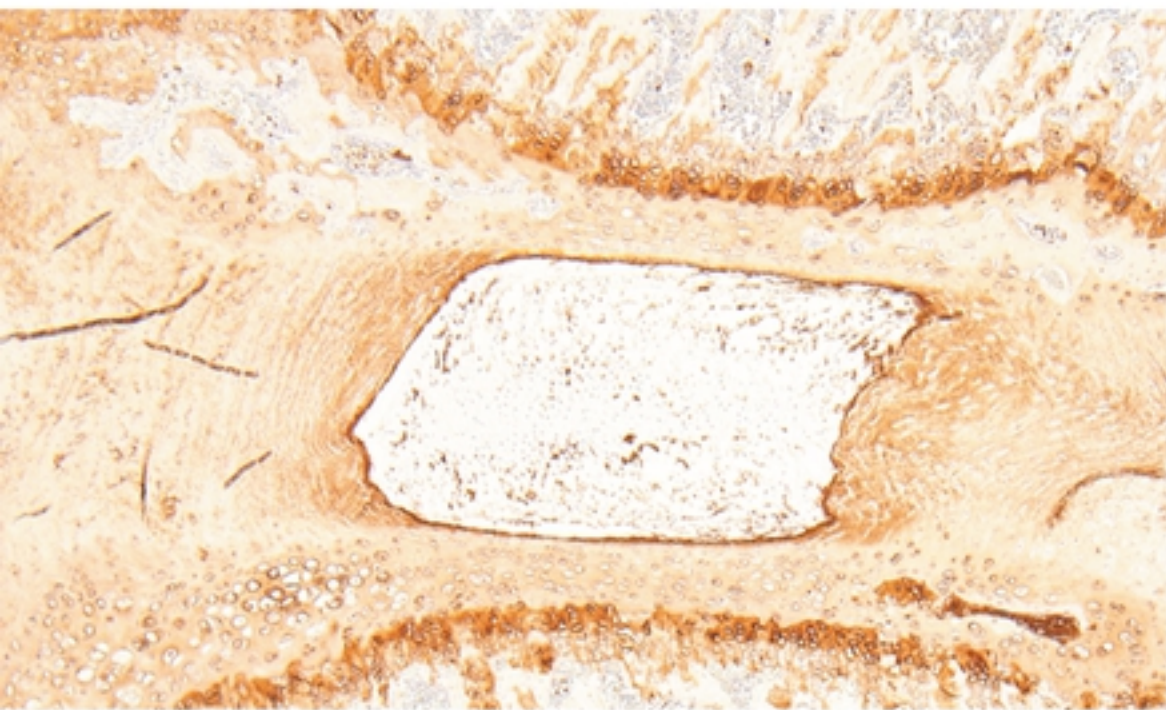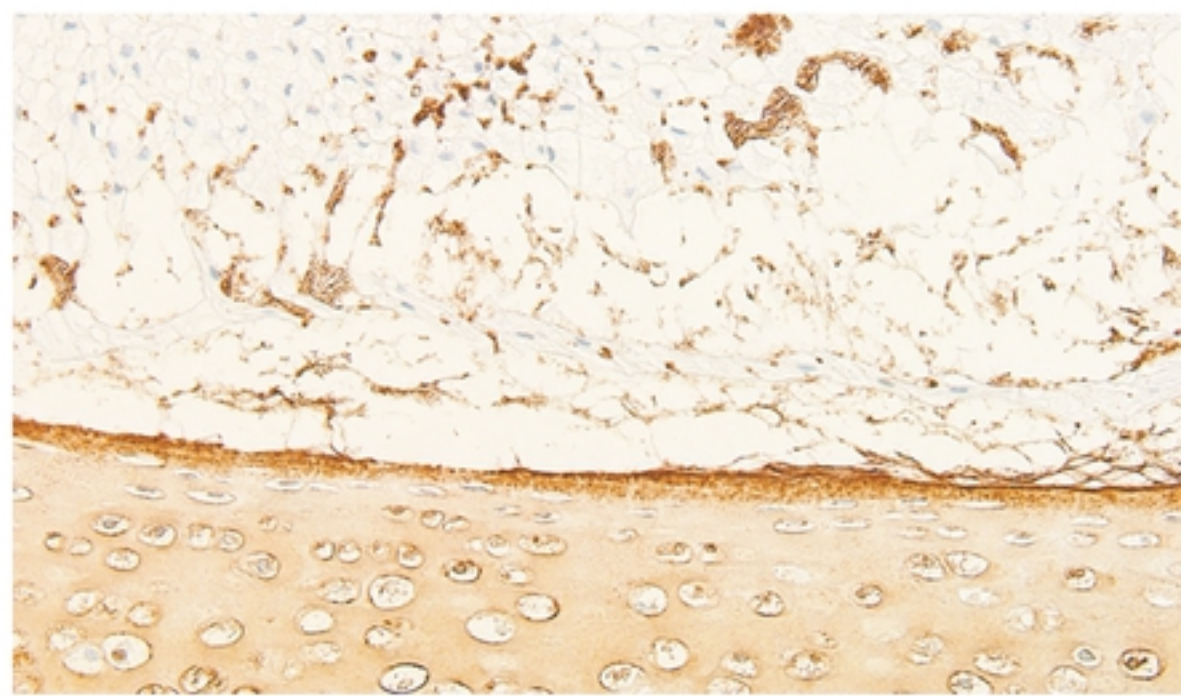

# Negative control(N8)

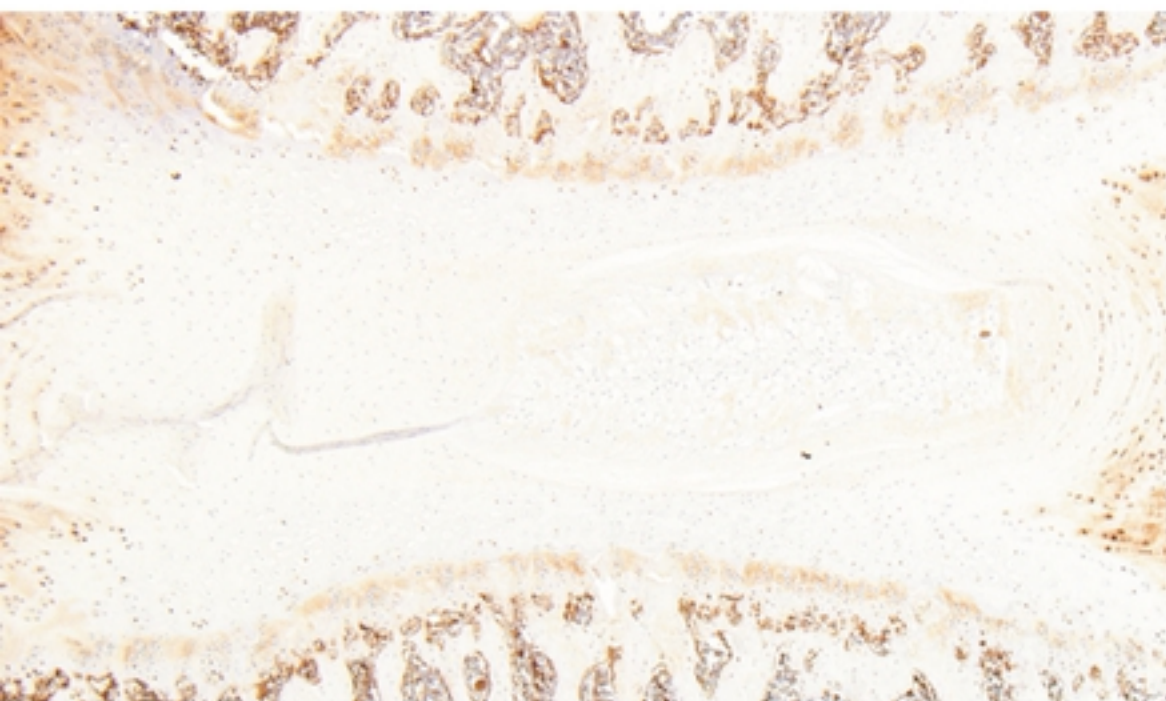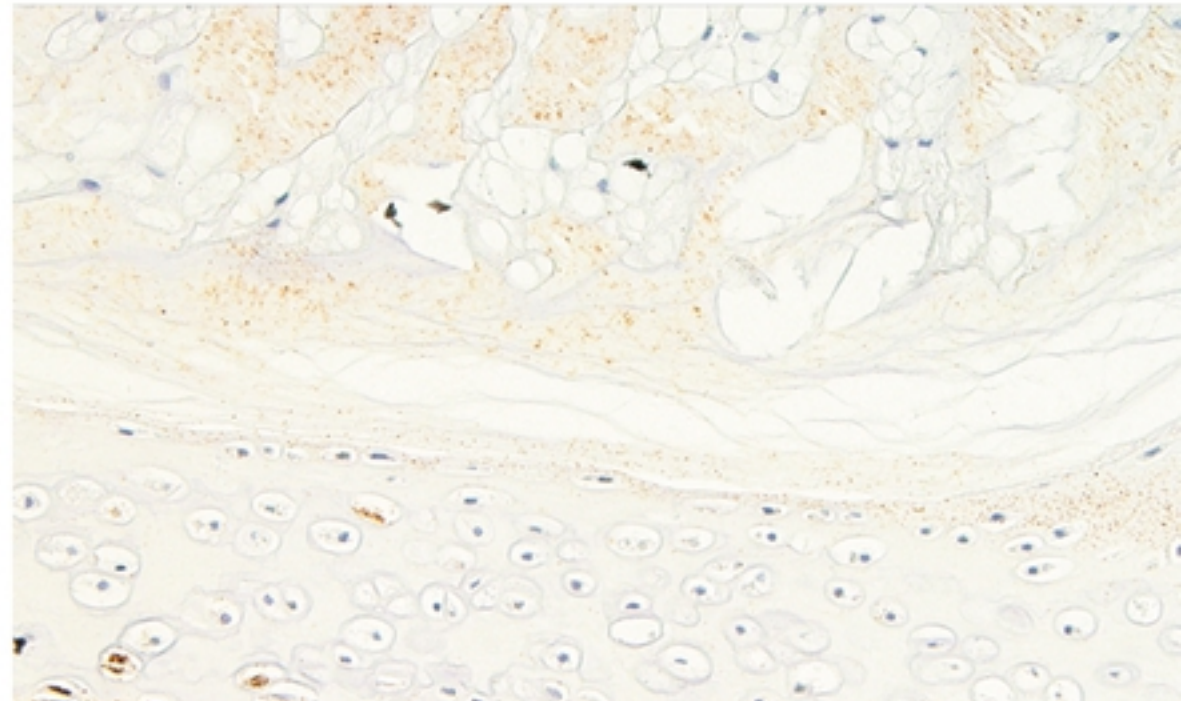

# Fig2A

*NP*

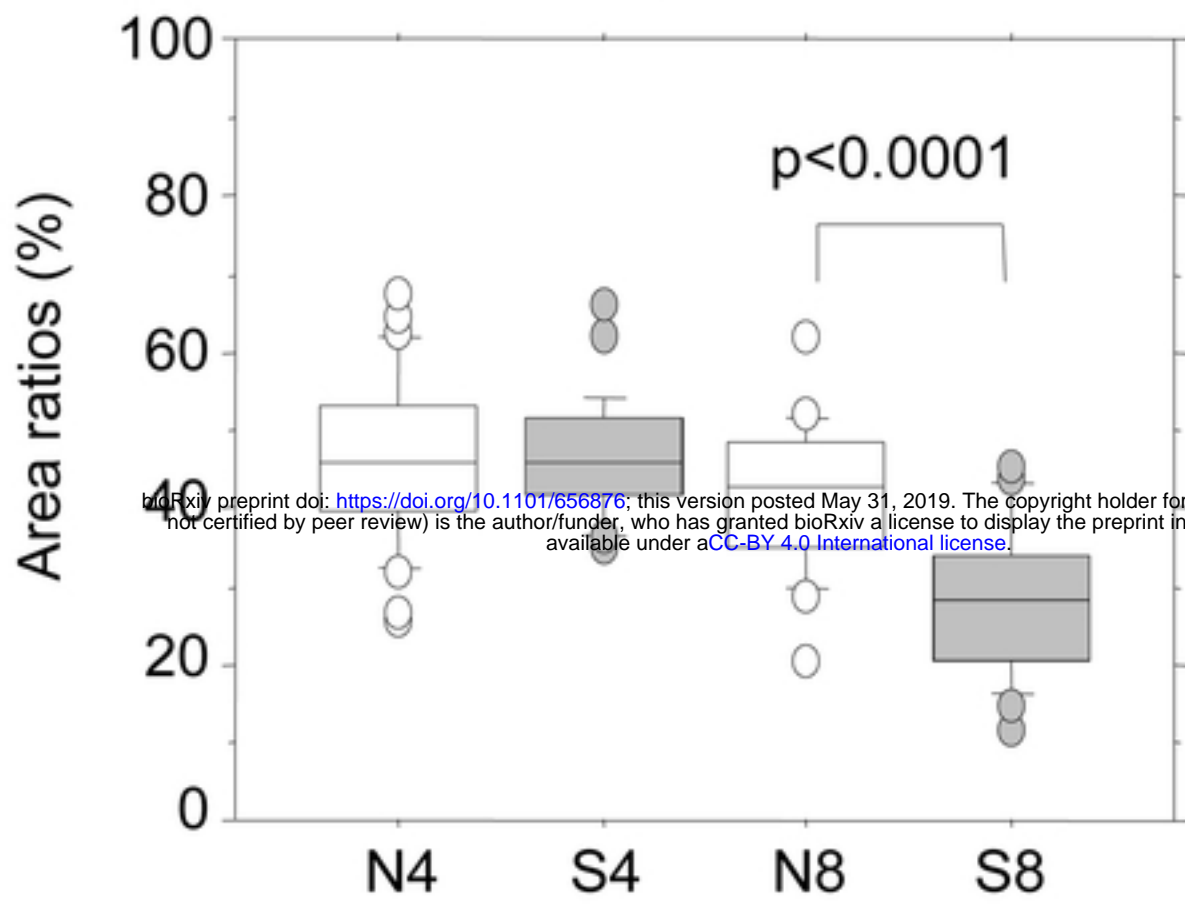

*CEP (central)*

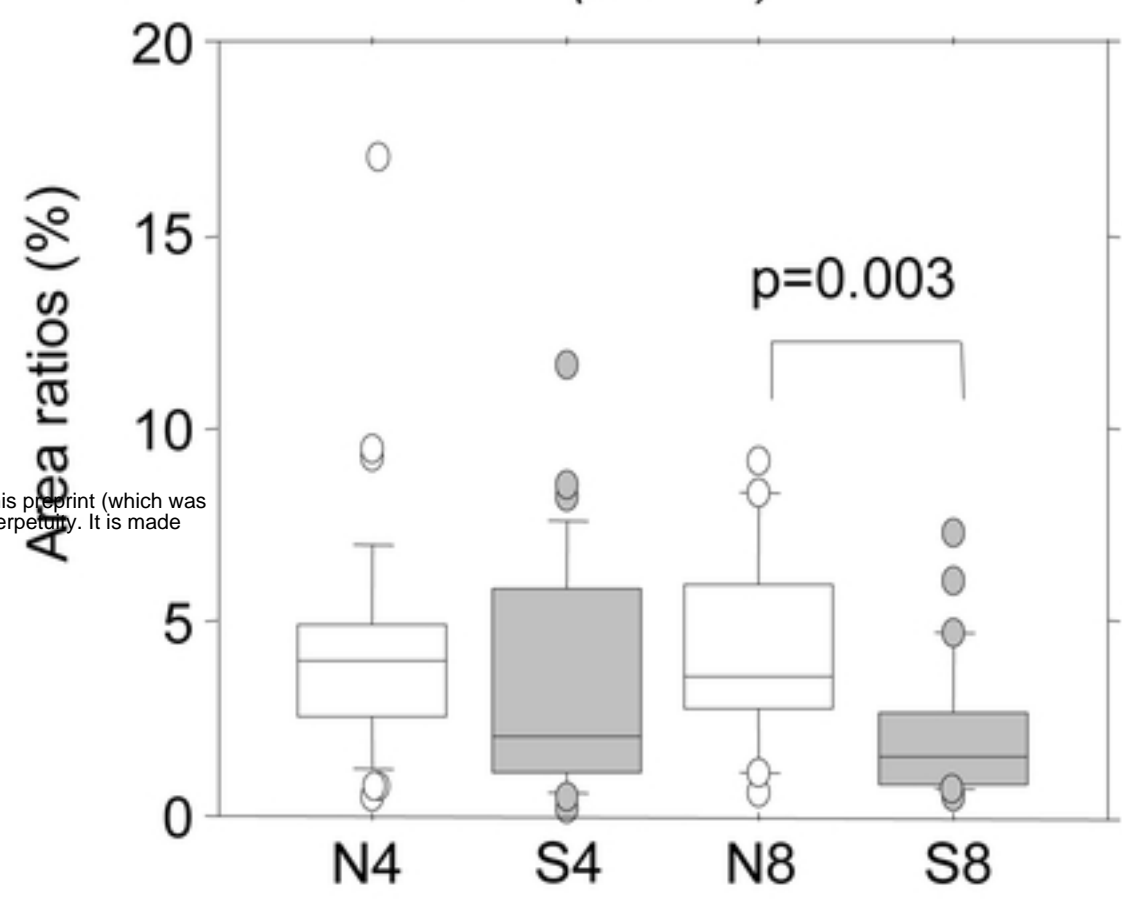

Fig2B

# N8

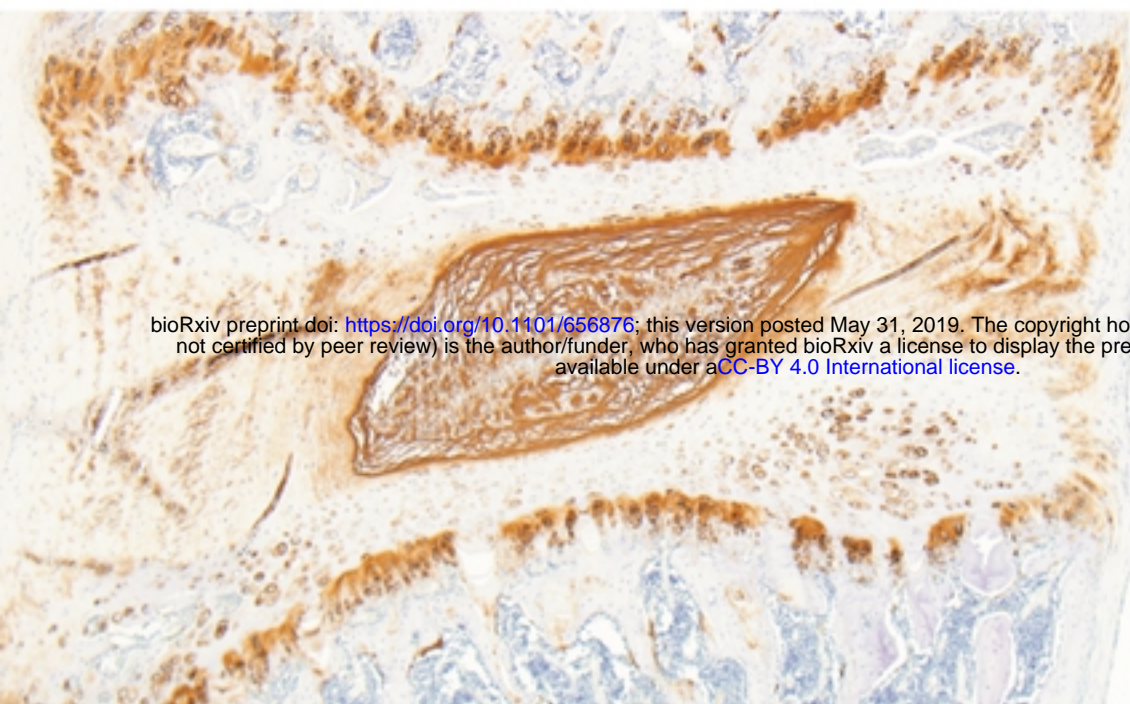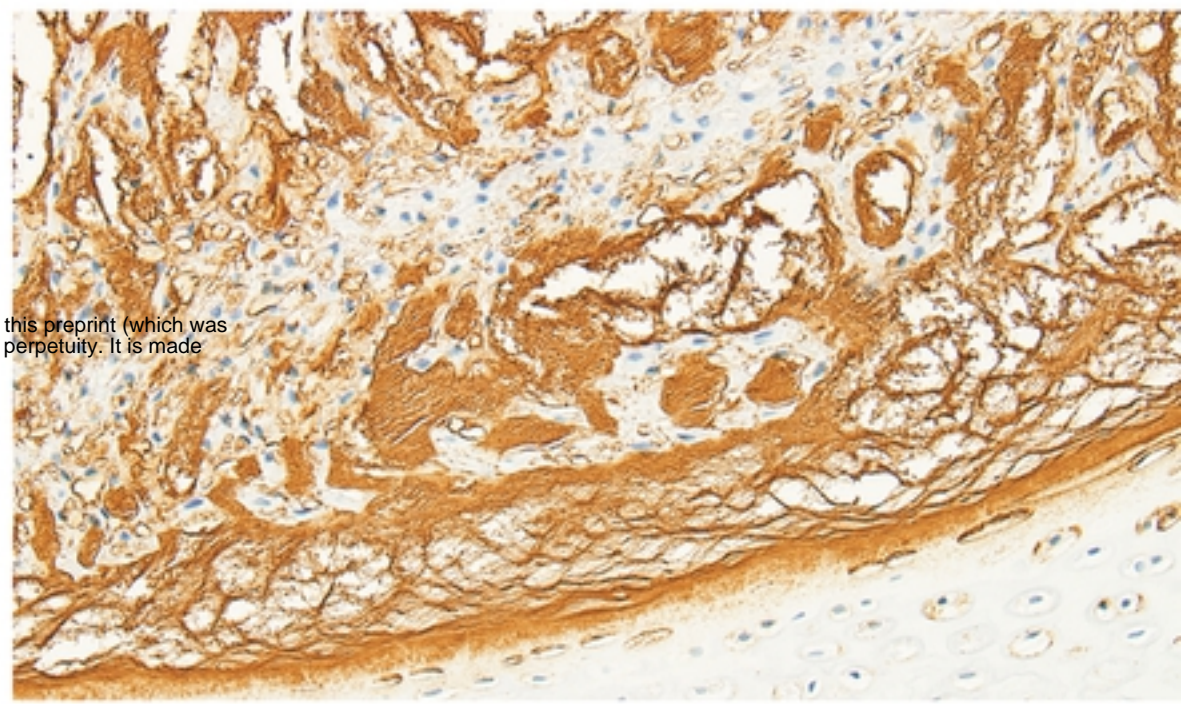

# S8

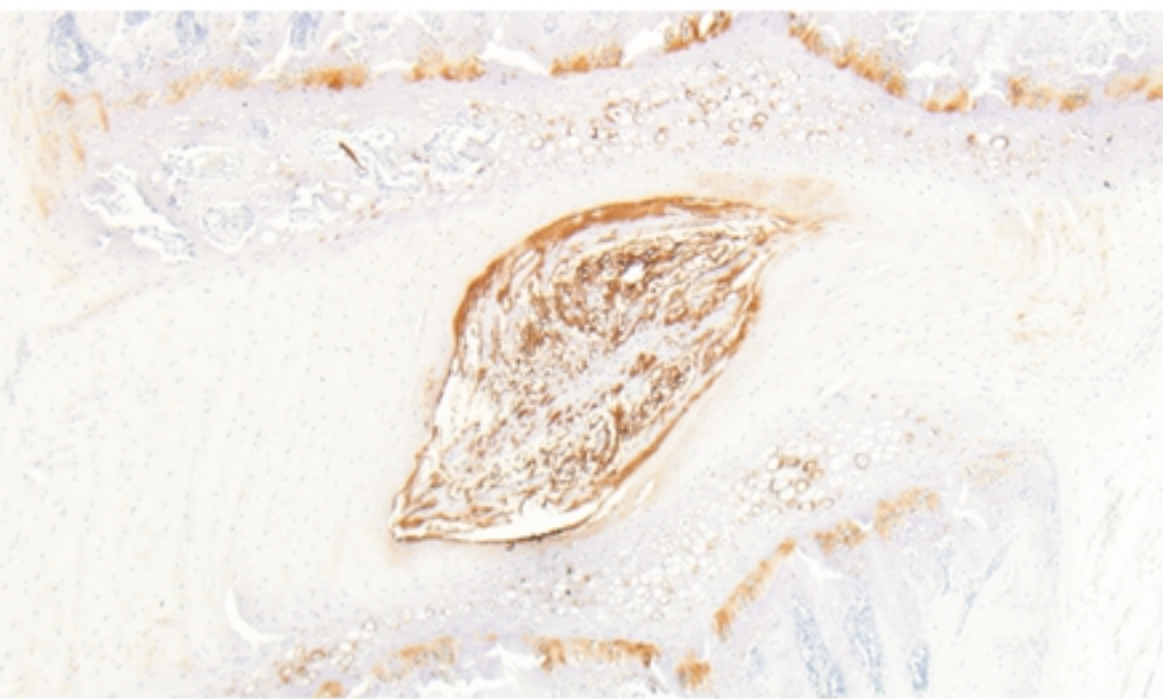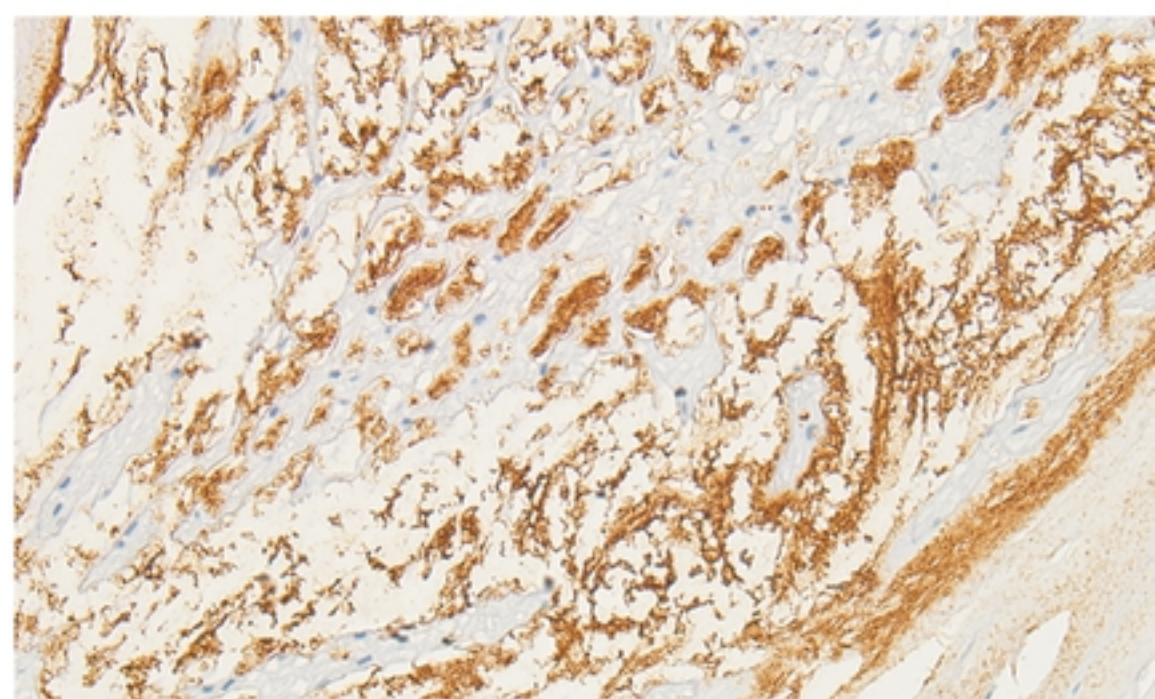

# Fig3A

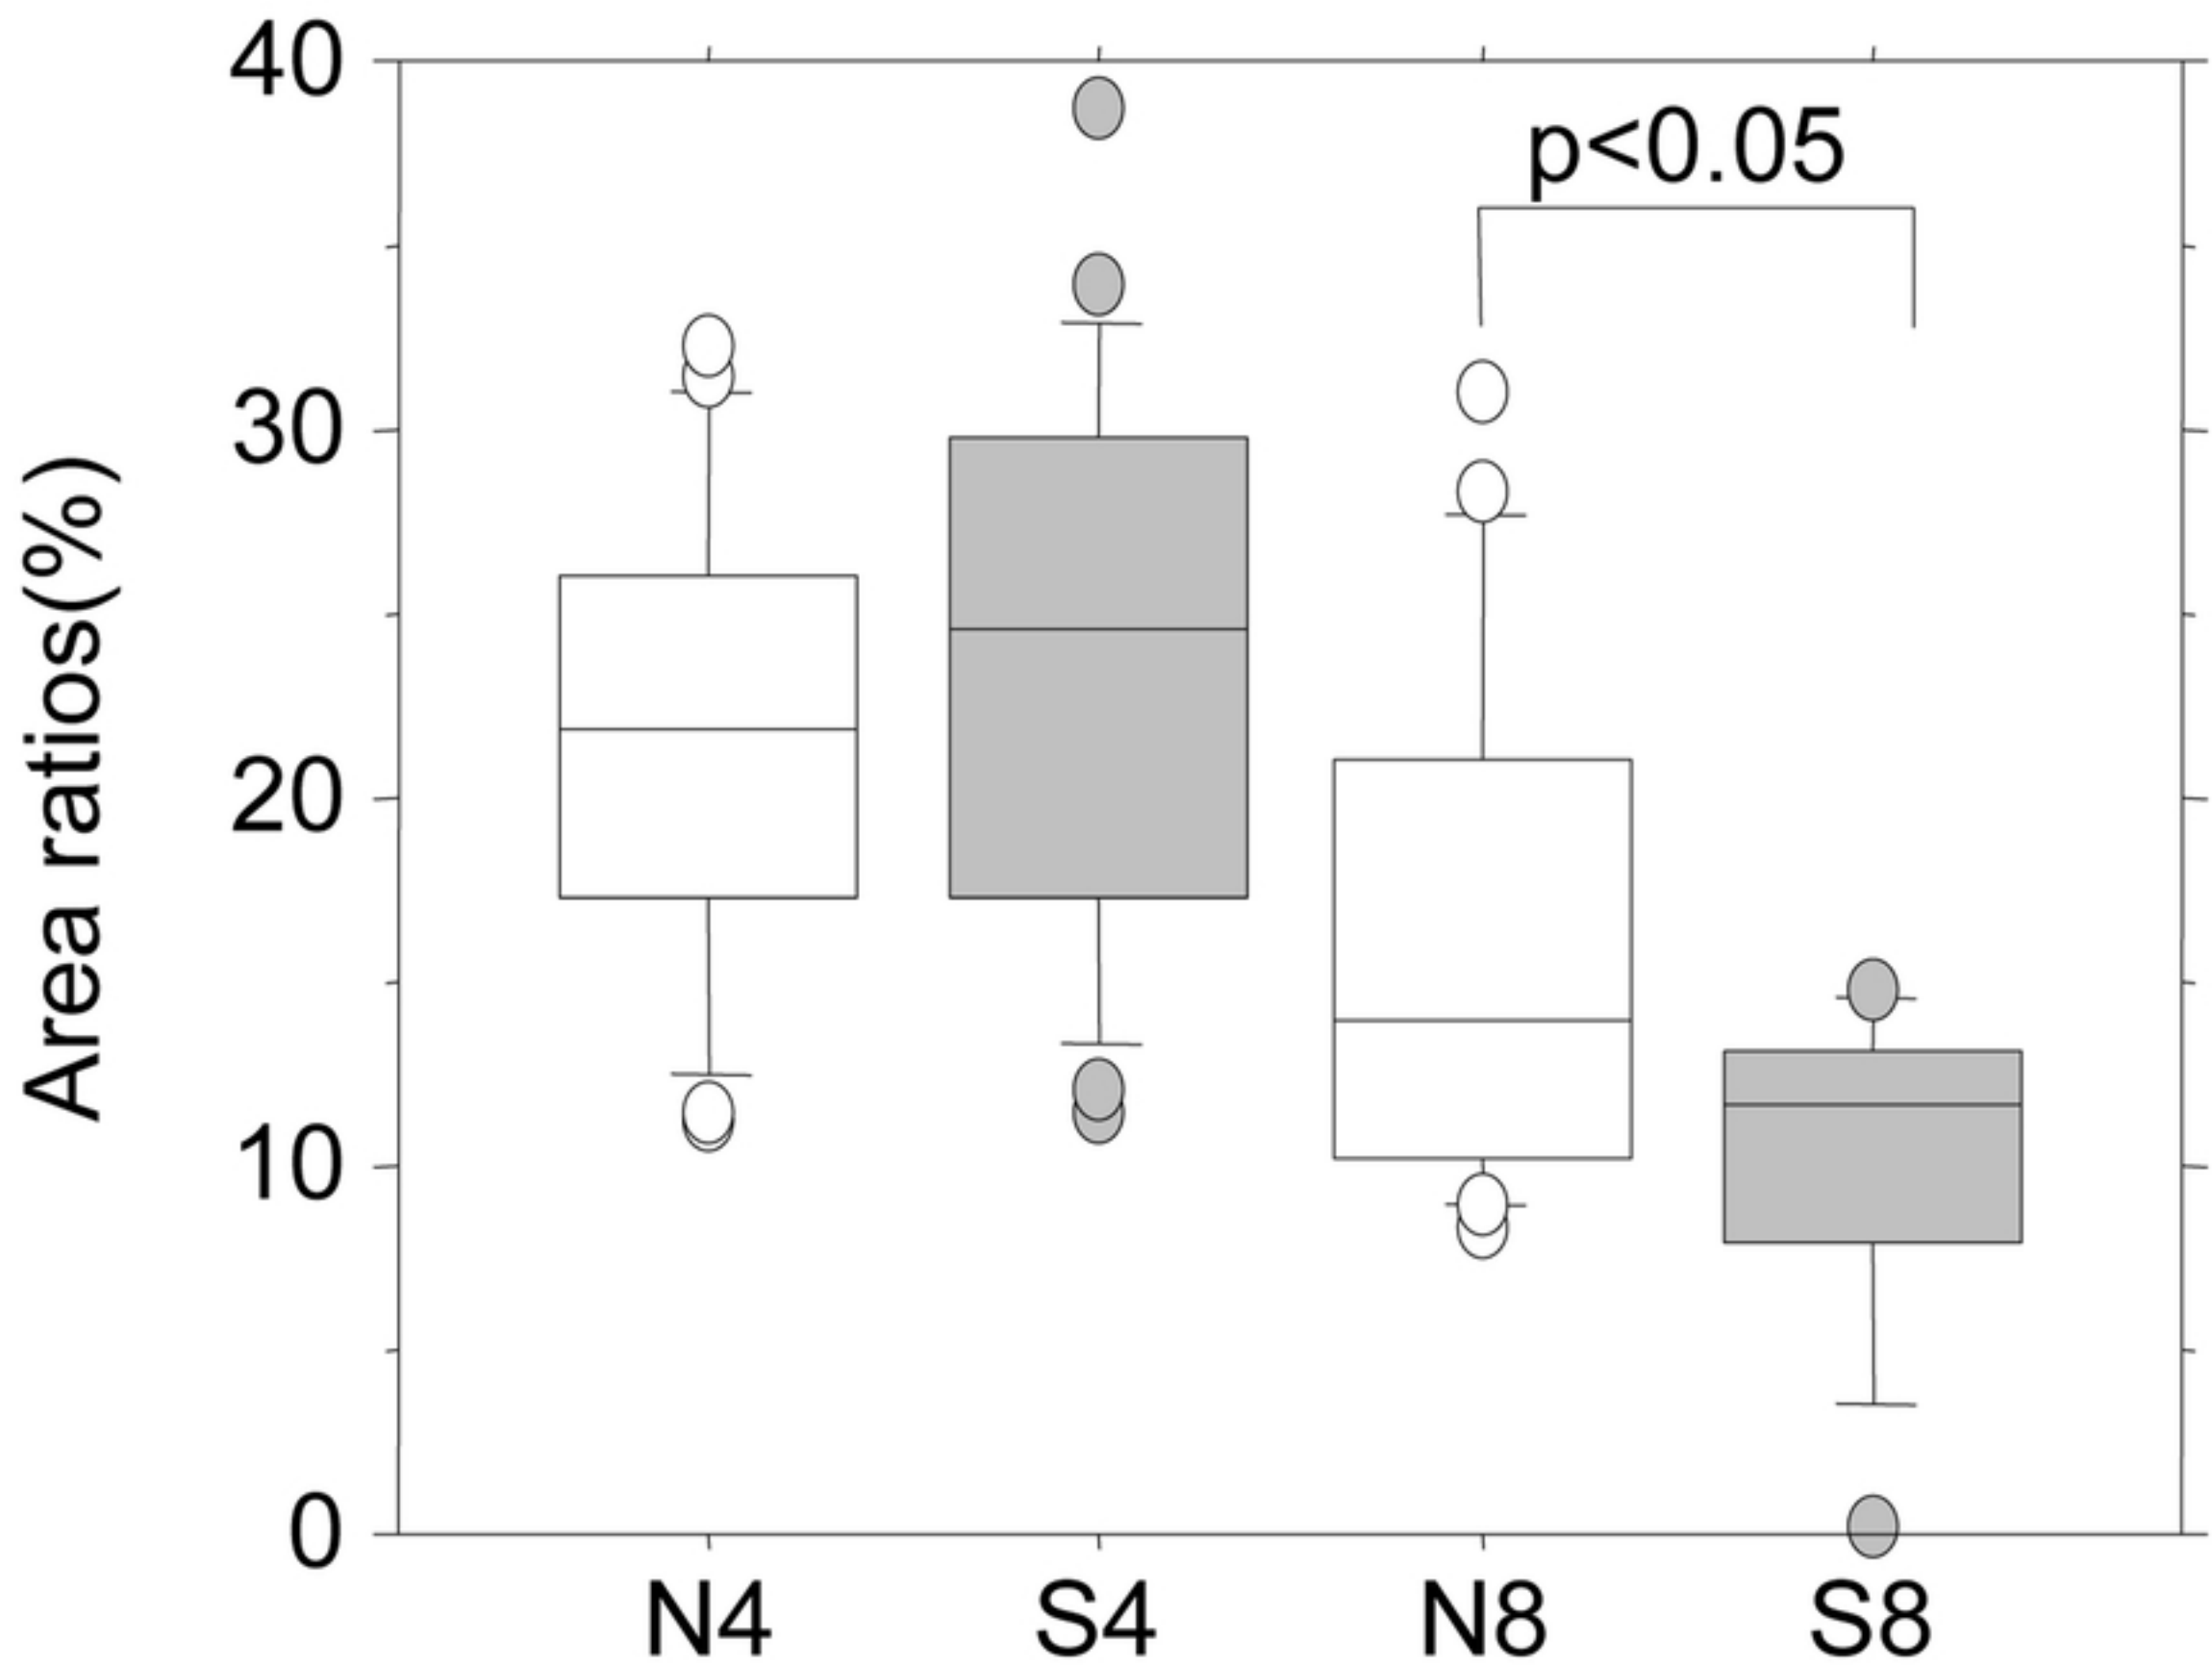

Fig3B

N4

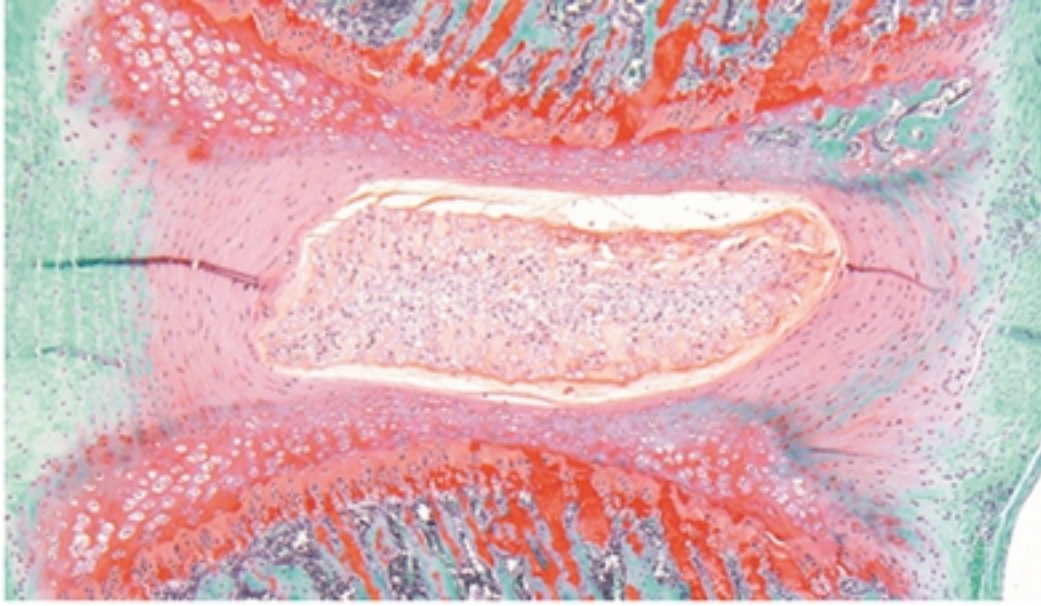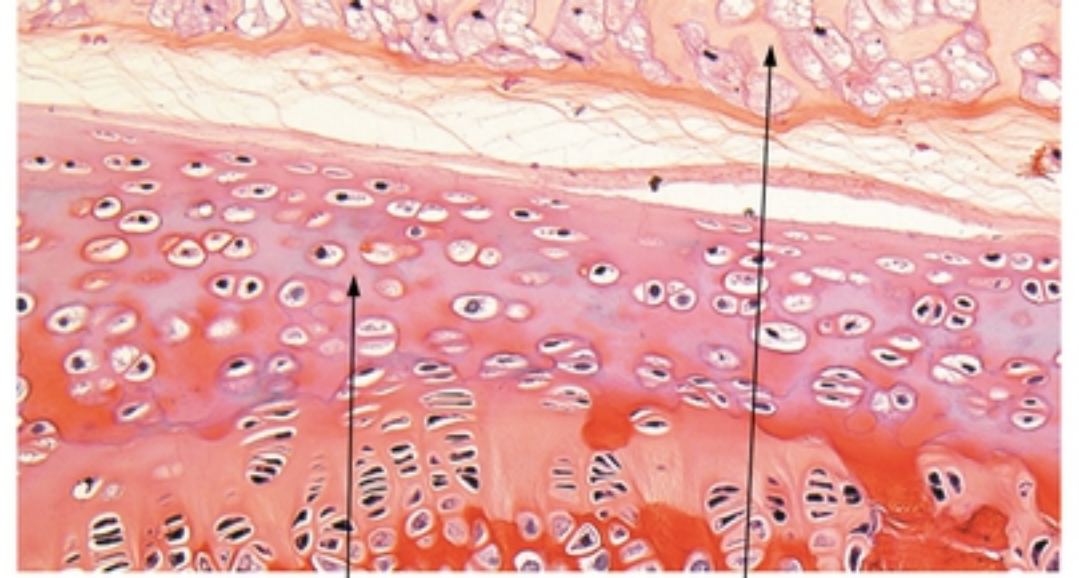

CEP

NP

bioRxiv preprint doi: <https://doi.org/10.1101/656876>; this version posted May 31, 2019. The copyright holder for this preprint (which was not certified by peer review) is the author/funder, who has granted bioRxiv a license to display the preprint in perpetuity. It is made available under aCC-BY 4.0 International license.

S4

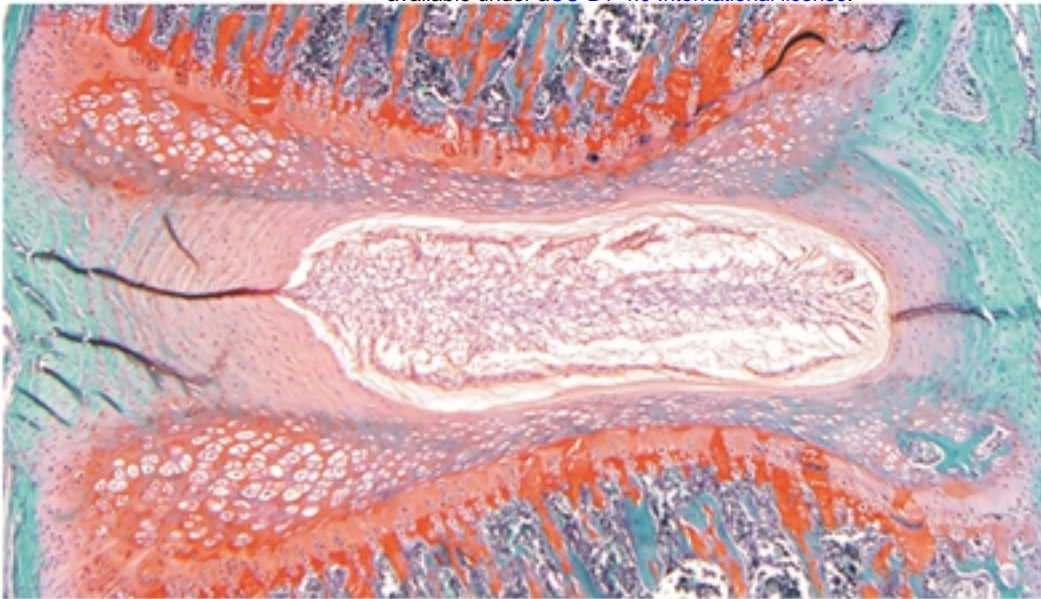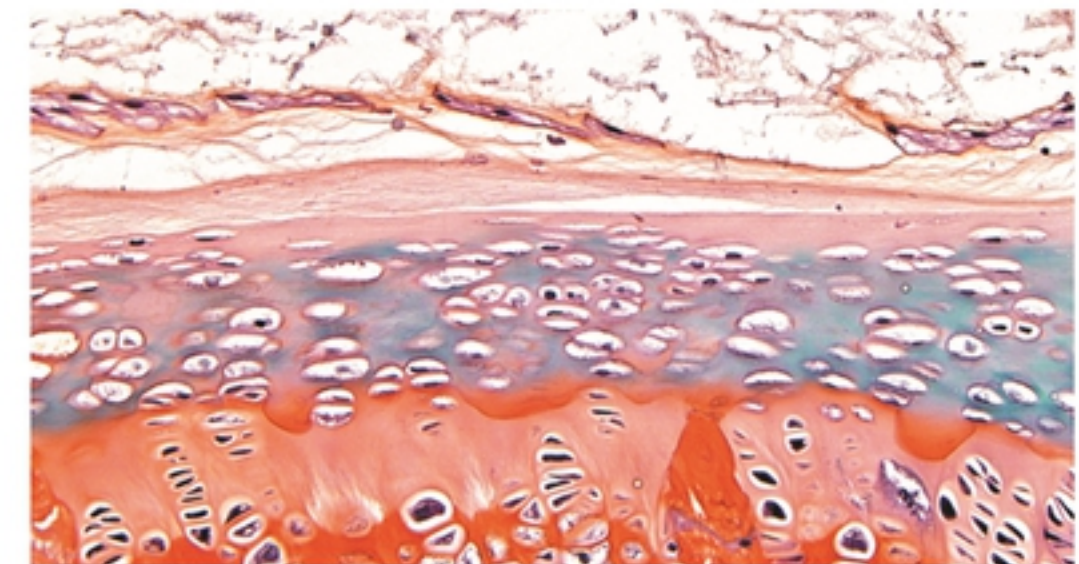

N8

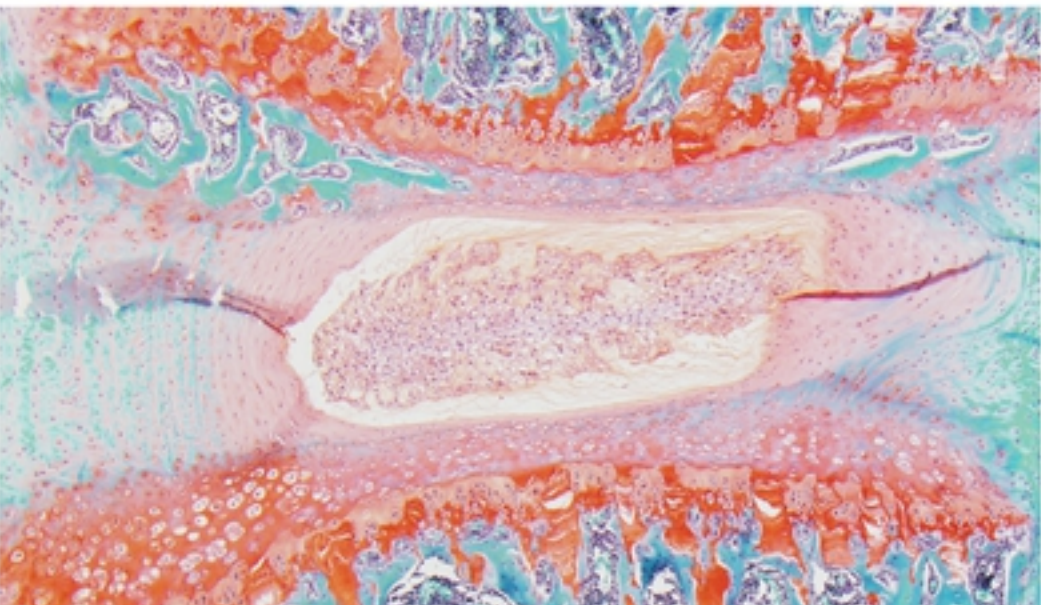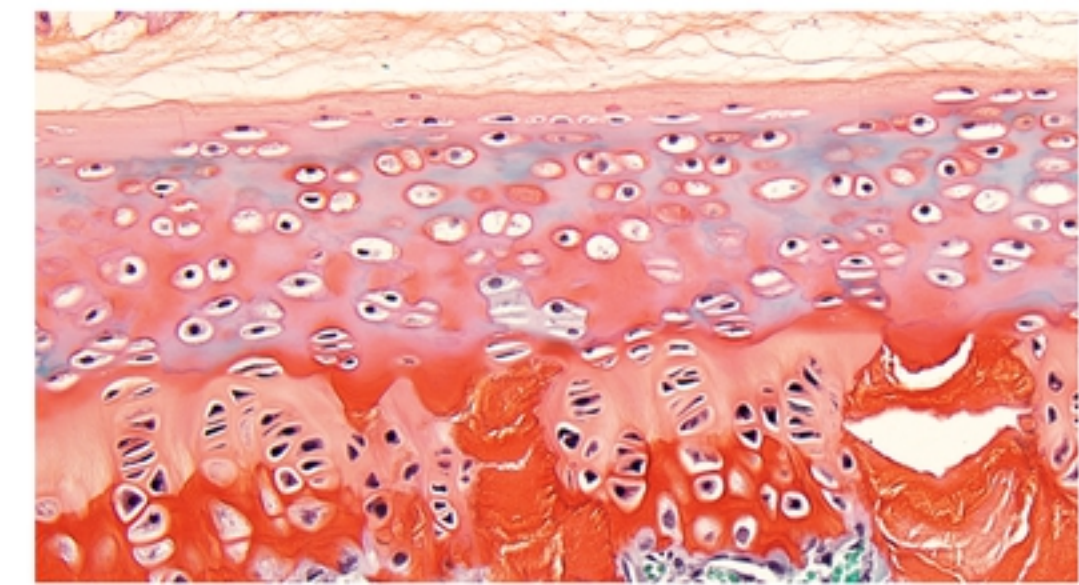

S8

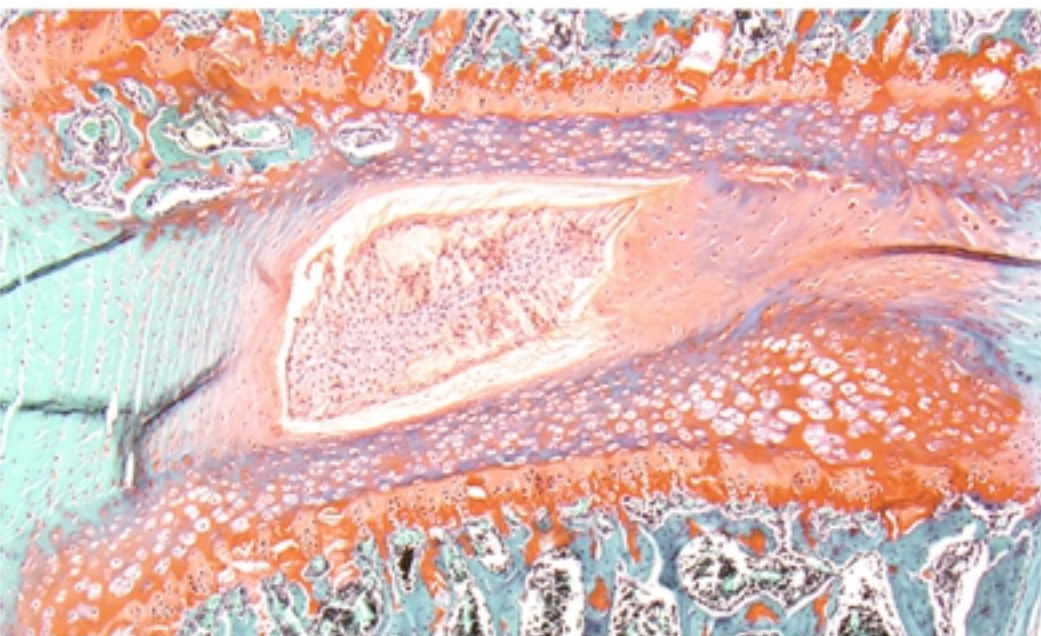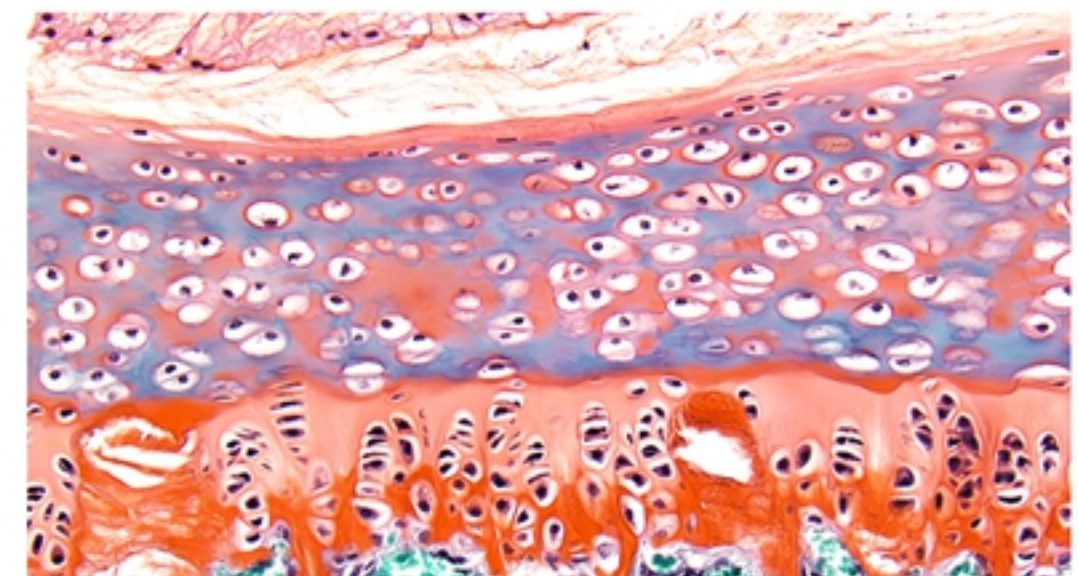

Fig4A

*CEP (peripheral)*

*CEP (central)*

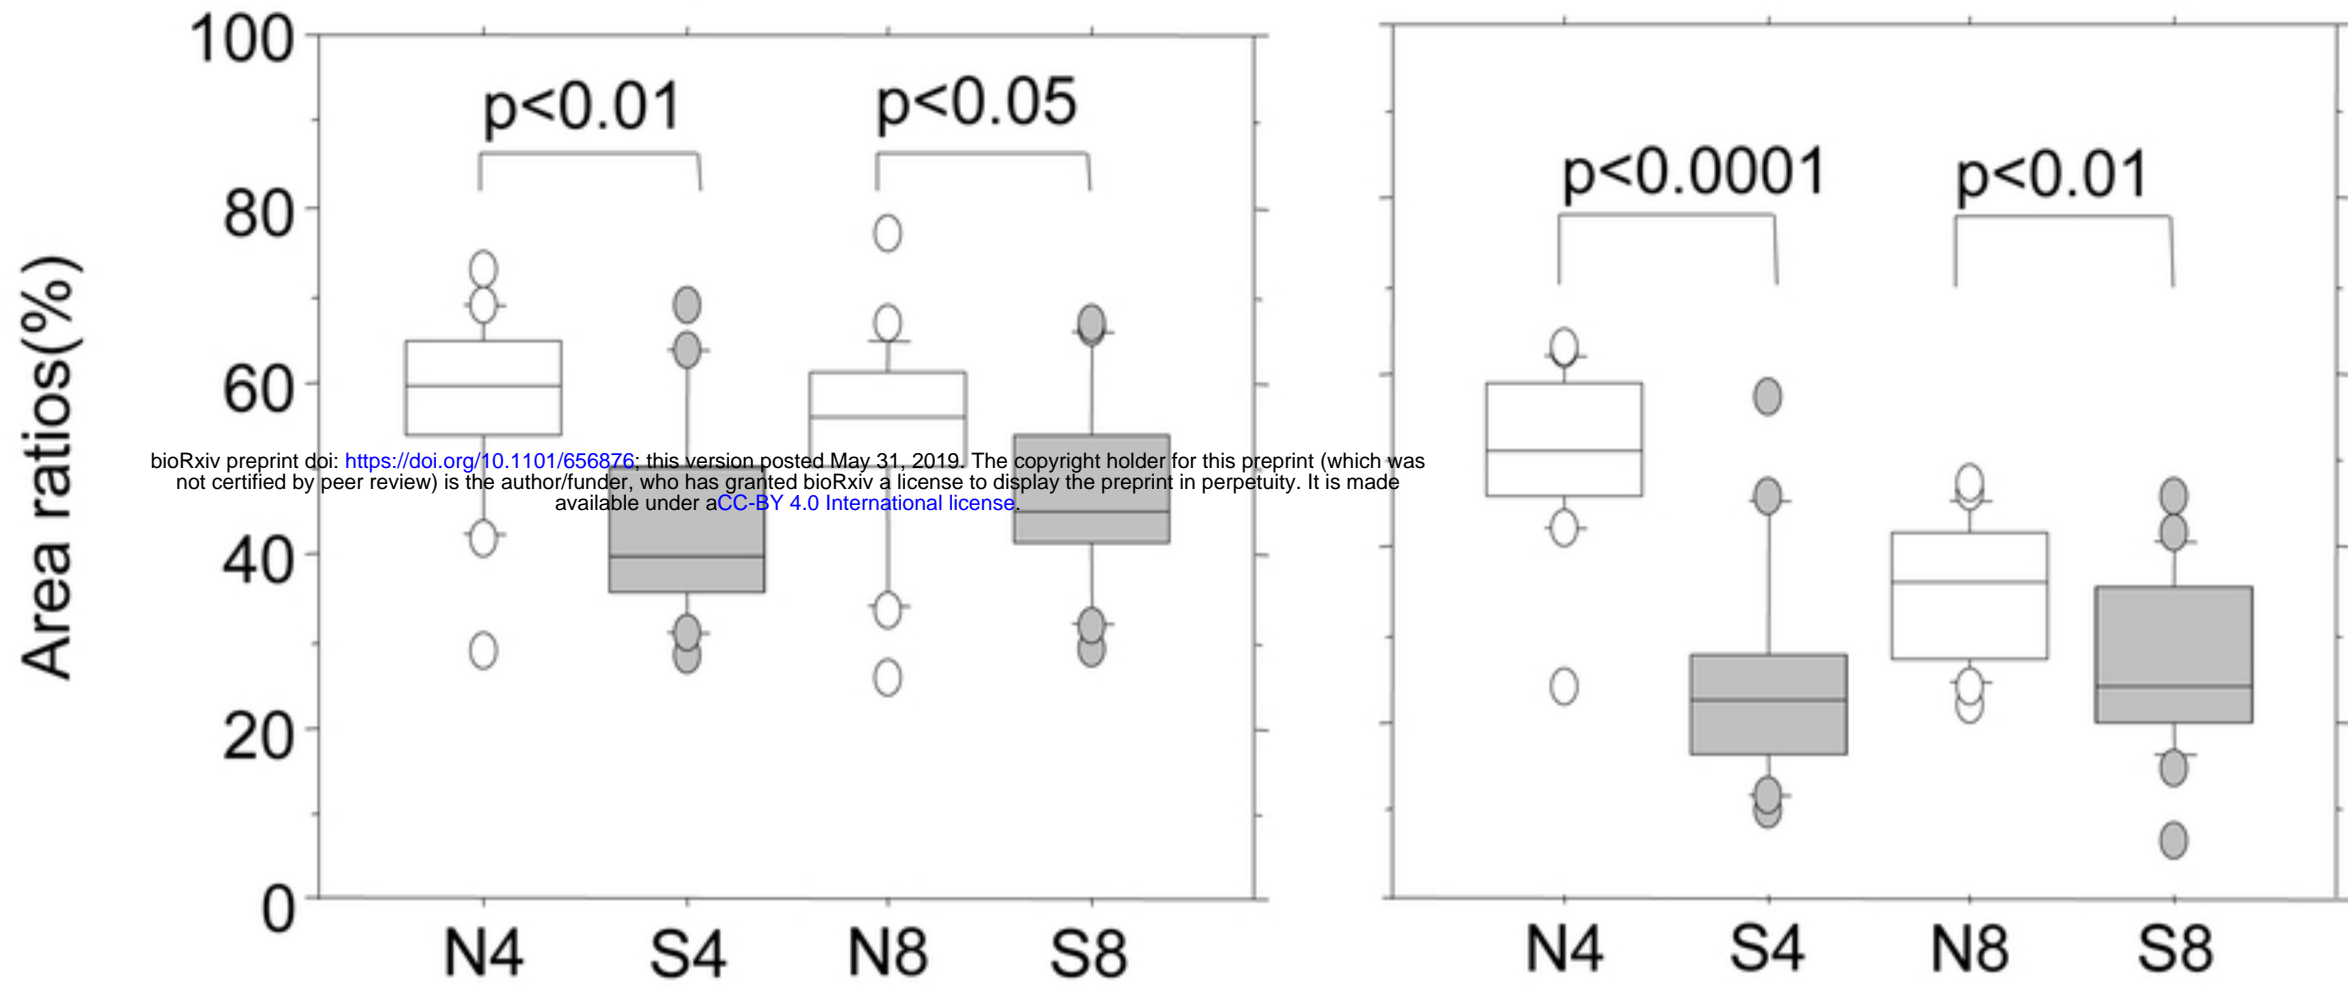

Fig4B

N4

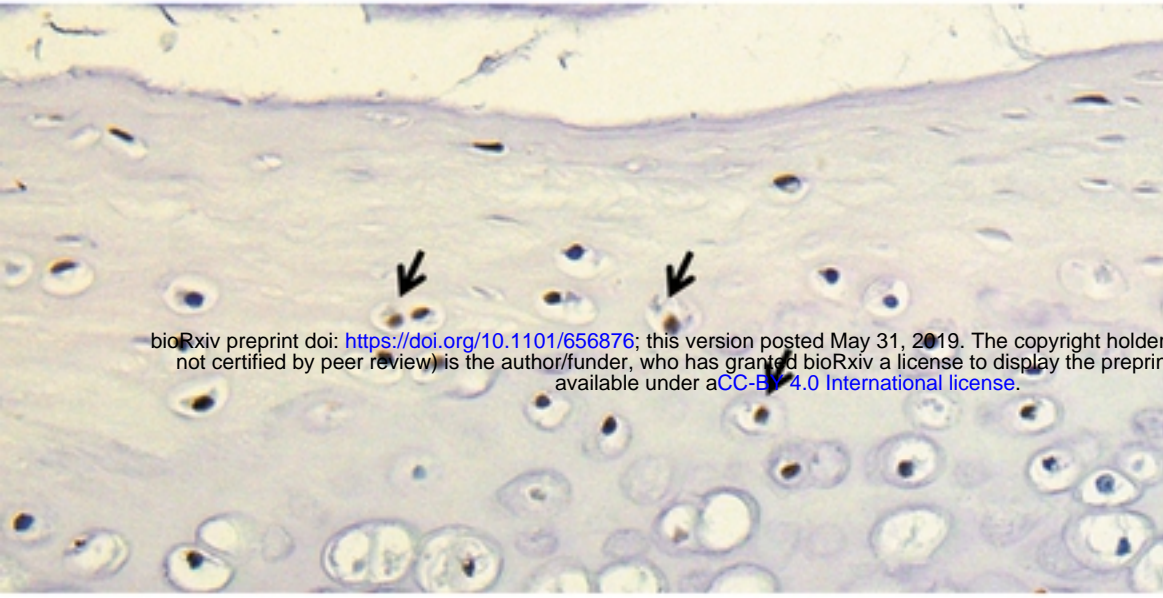

N8

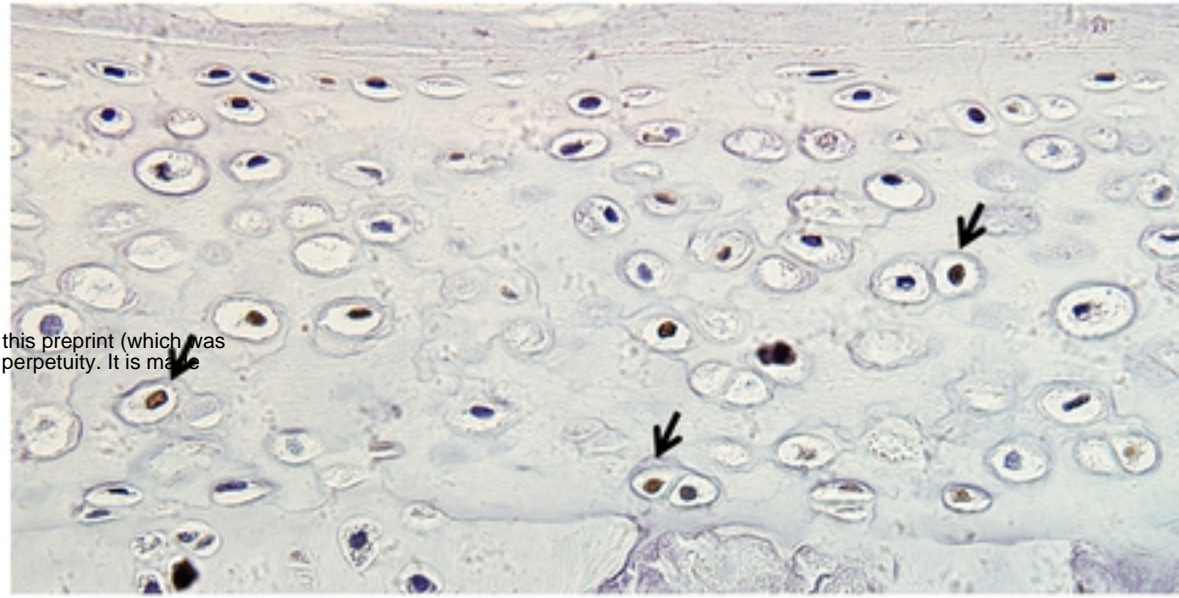

S4

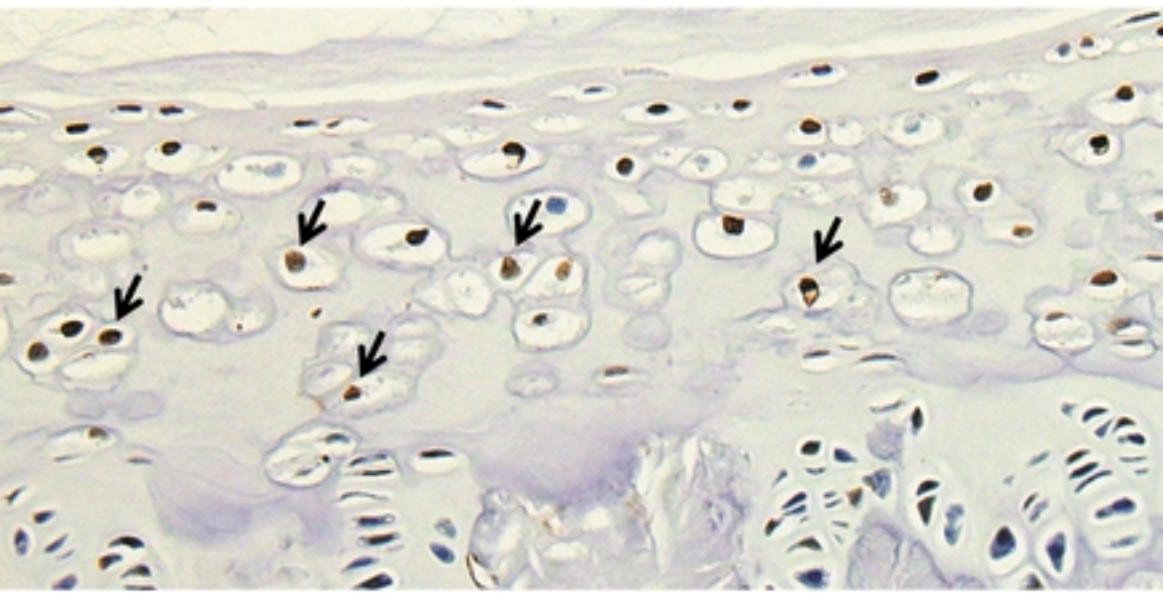

S8

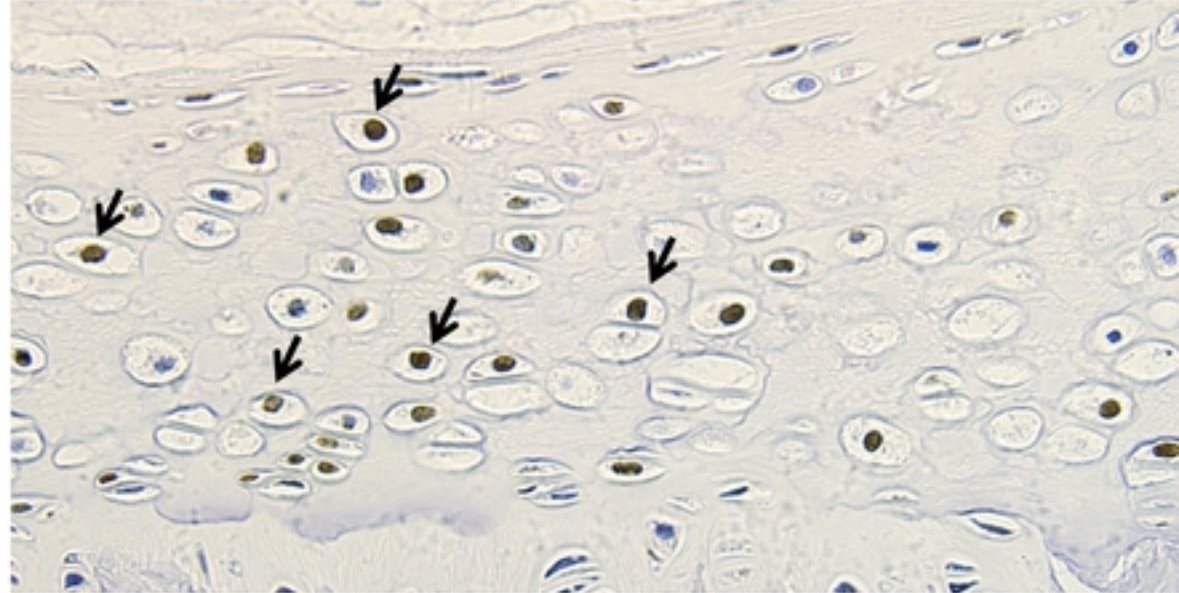

Fig5A



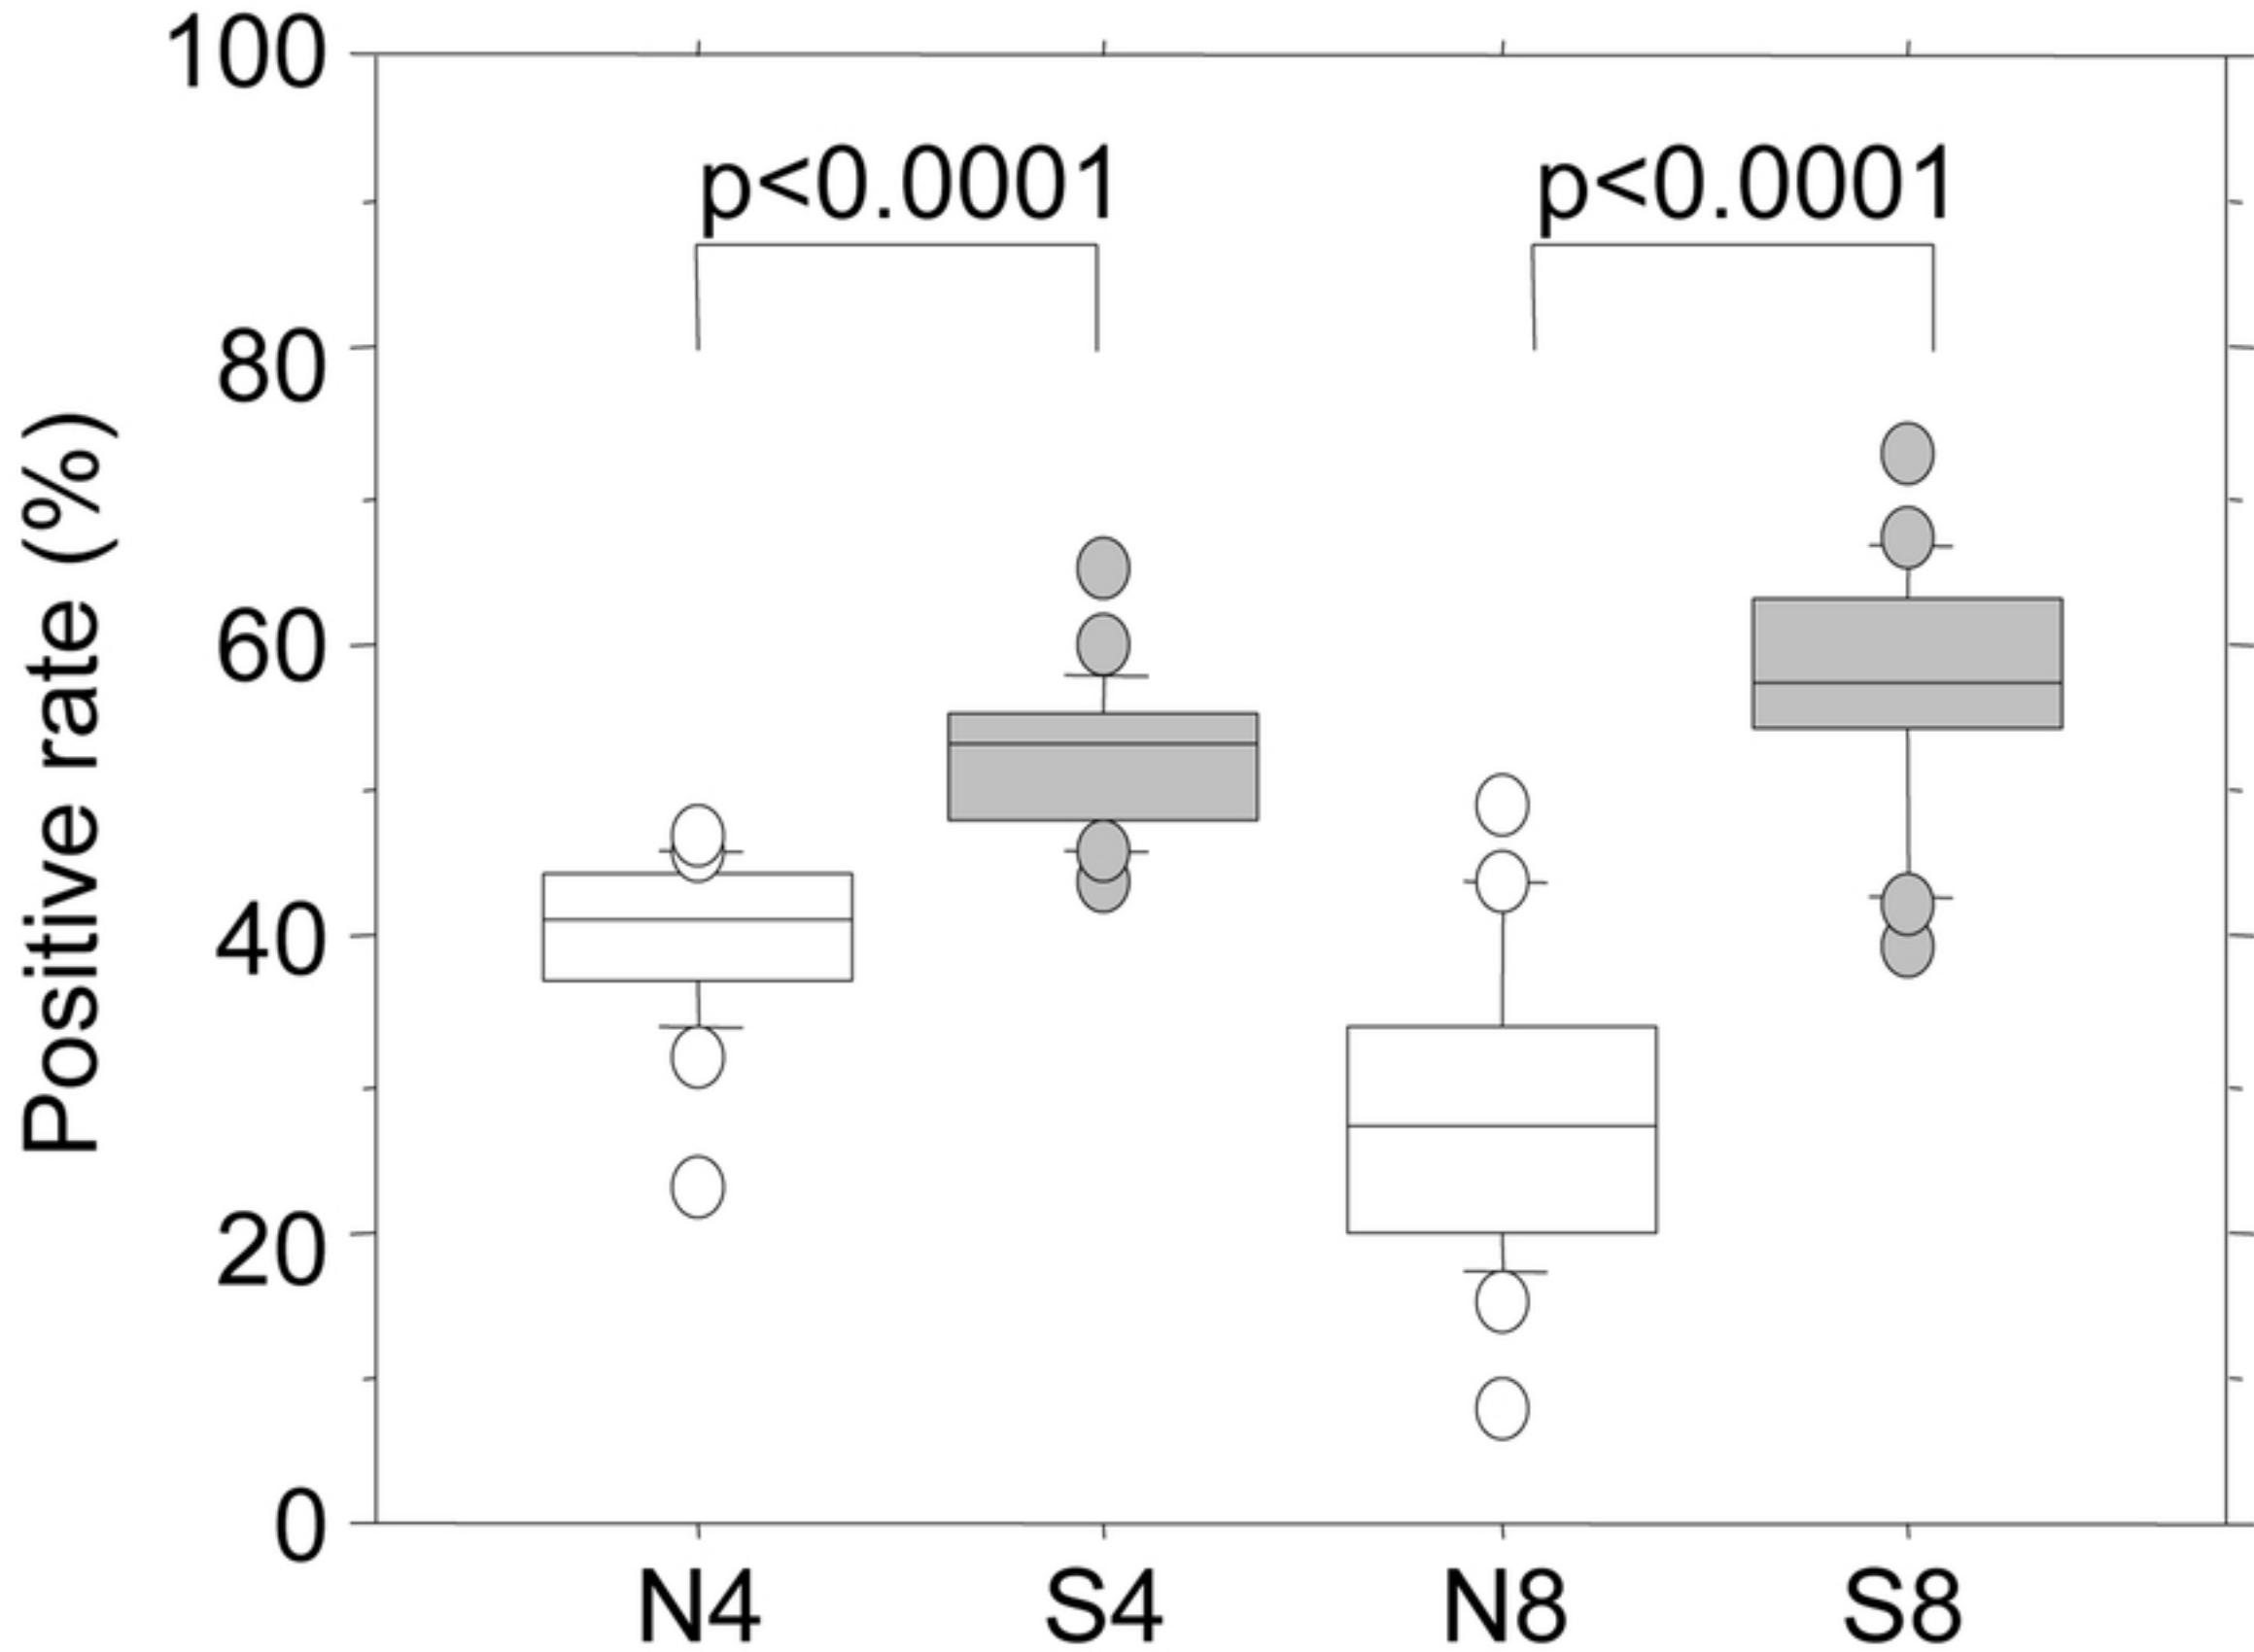

Fig5B

***Passive cigarette smoking***

(1) Decrease of blood flow

(2) CEP

AF

(3) NP

- Apoptosis of CEP cells
- Decrease of type II collagen and PG

- Decrease of type II collagen and PG
- Destruction of NP architecture

***Intervertebral disc degeneration***

Fig6

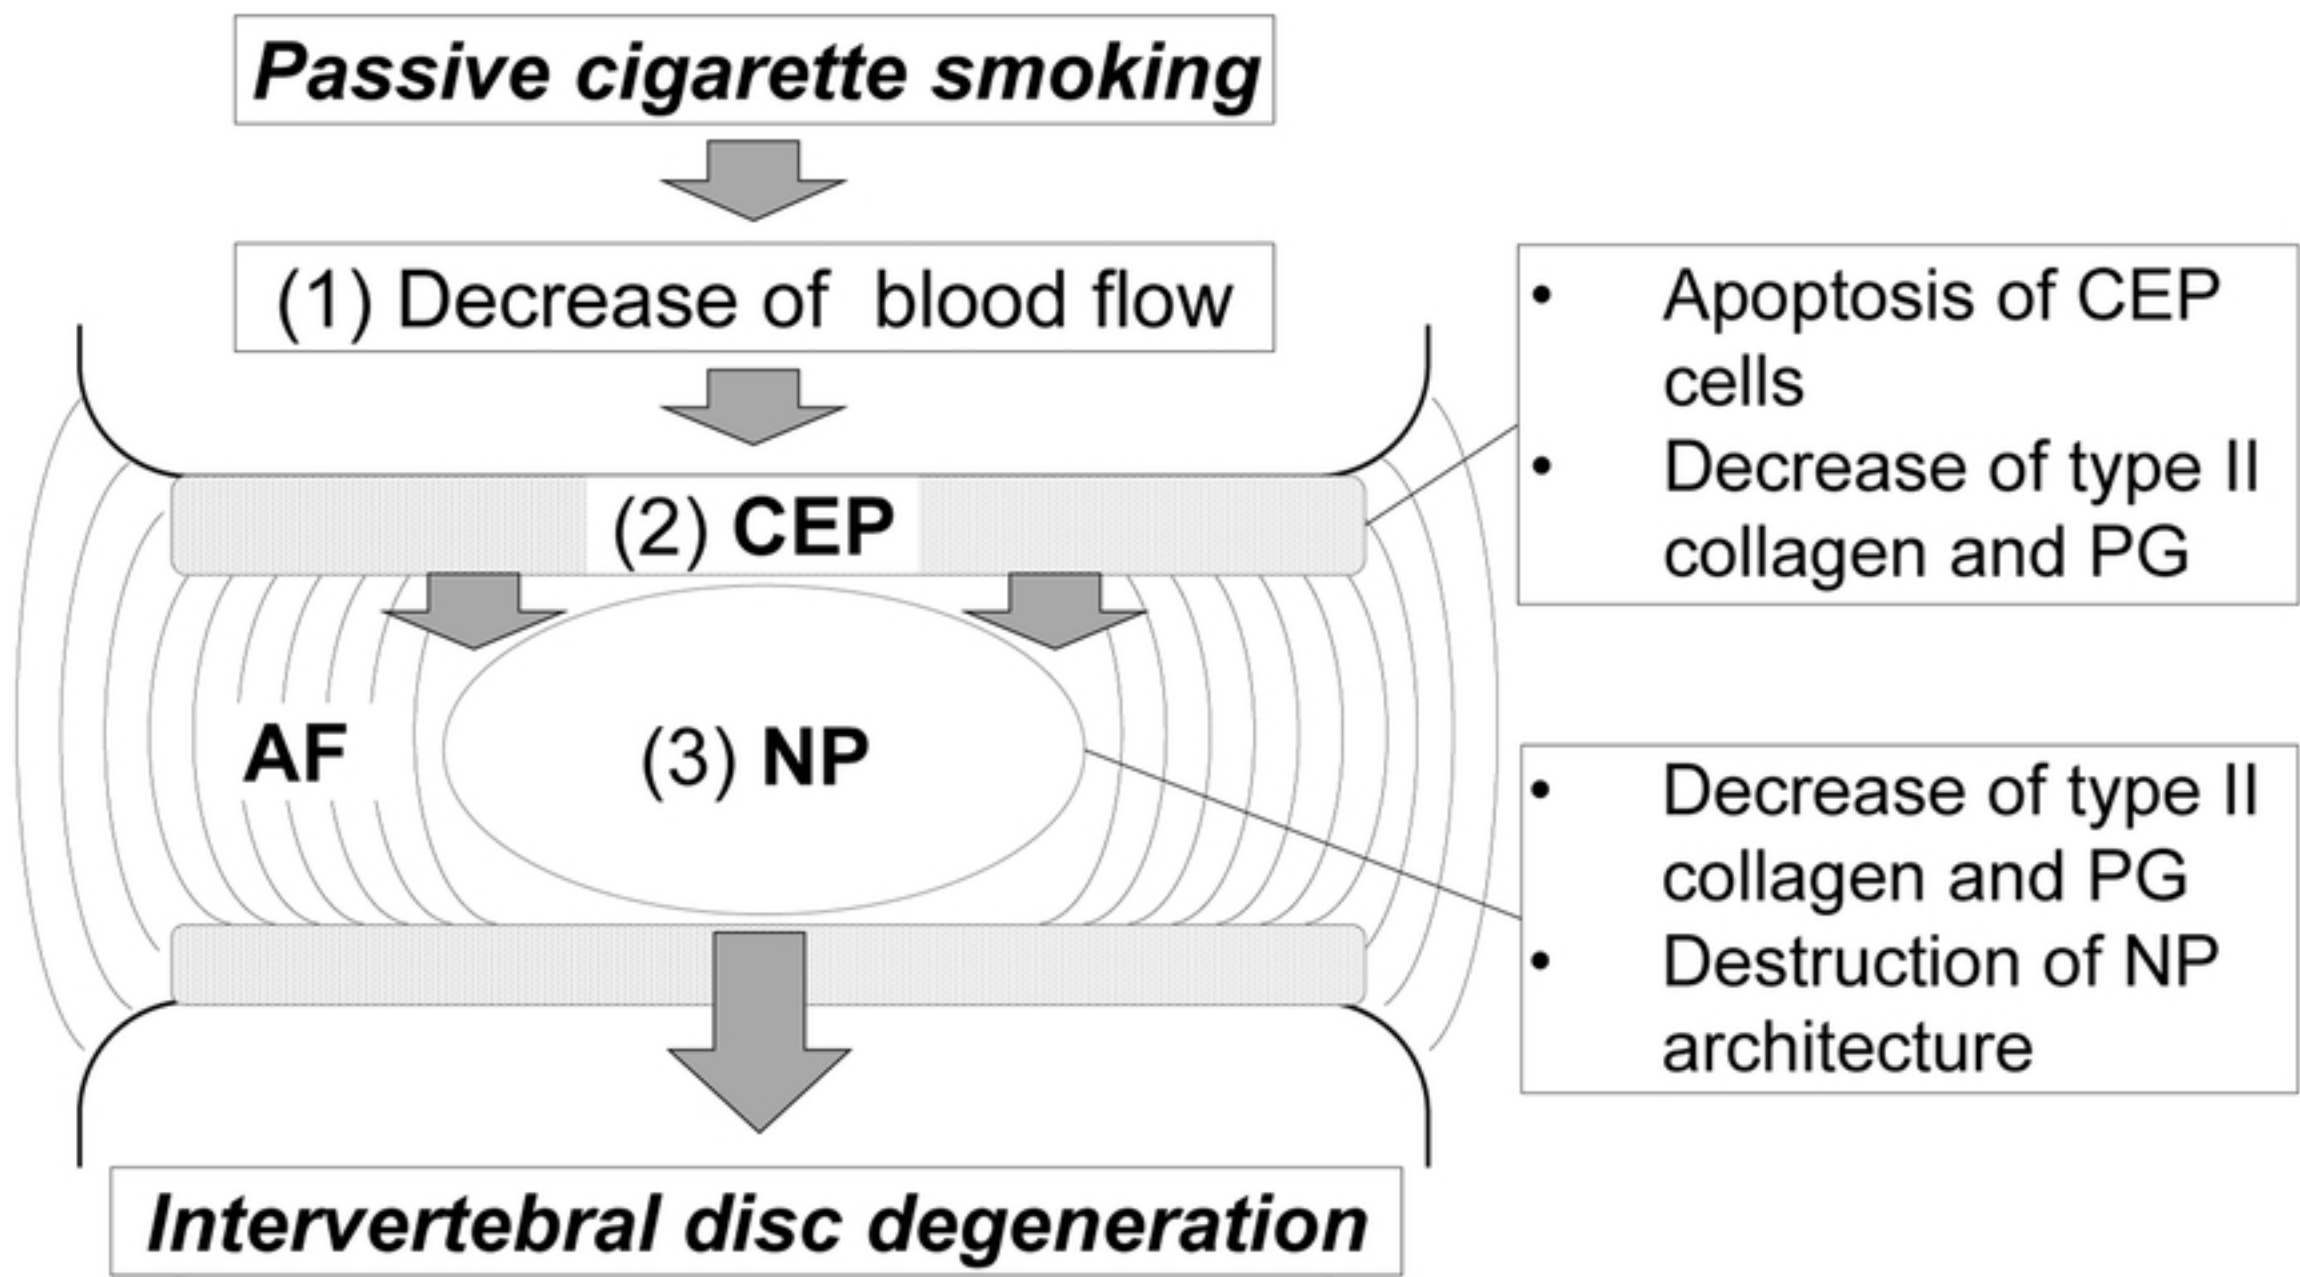

Source: https://www.biorxiv.org/content/10.1101/656876v1.full.pdf
